# Supplementary material for: Structure–property relationships in chalcones with extended π-conjugation: ICT perturbation and red fluorescence
Source: Royal Society of Chemistry journal article supplement (doi:10.1039/d5ma01288k), 2026-04-15
Supplement: d5ma01288k1.pdf [file d5ma01288k1.pdf]

## Supporting Information

### Structure–Property Relationships in Chalcones with Extended $\pi$ -Conjugation: ICT Perturbation and Far-Red Fluorescence

Brian Corbin, Paityn Houglan, Wei-Yuan Chen, Christopher J. Ziegler, Yi Pang\*

Department of Chemistry, The University of Akron, Akron, OH 44325-3601

| <b>Table of Content</b>                 | <b>Page number</b> |
|-----------------------------------------|--------------------|
| Synthesis                               | 3                  |
| $^1\text{H}$ and $^{13}\text{C}$ NMR    | 4-15               |
| ESI-MS                                  | 16-18              |
| Photophysical properties in solution    | 19-21              |
| Low temperature excitation and emission | 22                 |
| Fluorescent lifetimes                   | 23                 |
| Crystal packing                         | 24-28              |
| Computational results                   | 29-31              |

**Experimental details for Mass Spectrometry Study.** Mass spectrometry analysis was performed using a timsTOF Pro 2 Q/ToF (Bruker Billerica, MA), equipped with an electrospray ionization (ESI) source with an average mass resolving power of 50,000 FWHM (full width at half maximum). Stock samples were delivered dissolved into acetonitrile (ACN) to a concentration between 1-2 mg/mL. Before mass spectrometry analysis, the samples were filtered using Acrodisc 13 mm 0.2  $\mu$ m PTFE filters followed via serial dilutions using ACN to a concentration between 20-100 ng/mL. The sample was then injected into the instrument via direct injection using a 1 mL syringe. The samples were ionized by ESI under the following optimized conditions. The mass range was set to m/z 50-500 at a rate of 1 Hz and MS averaging set to 1. The end plate offset, capillary voltage, nebulizer gas, dry gas, and dry temp were set to 400 V, 4000 V, 1.5 mbar, 4 L/min, and 150 °C, respectively. The polarity of the timsTOF was set to positive mode. For positive mode mass calibration, the calibrant solution used was ESI-L Low Concentration Tuning Mix (Tune Mix) and was obtained from Agilent Technologies (Santa Clara, CA). Before infusion into the mass spectrometer, the Tune Mix was diluted using a 1:1 mixture of acetonitrile and water, both Optima LC/MS grade, and were purchased from Fisher Scientific (Fair Lawn, NJ). All mass spectral data were collected using timsControl (Billerica, MA) and analyzed using Compass DataAnalysis (Billerica, MA) software. Peak processing parameters used the Sum Peak algorithm and the parameters are as follows: S/N threshold 10, Relative intensity threshold 0.1 %, the Absolute intensity threshold 100%, and Background Subtract Analysis Mode set to Xpose with a retention time window of +/- 0.5 s and a ratio of 5.

## Synthesis of chalcones 1a-1f

Chalcone **1a** ((2E,4E)-5-(4-(dimethylamino)phenyl)-1-phenylpenta-2,4-dien-1-one): Acetophenone (1.1 mmol) and 4-(dimethylamino)cinnamaldehyde (1 mmol) were combined in ethanol (5 mL) in a 50 mL round-bottom flask and stirred for 5 min. Pyrrolidine (0.10 mL) was then added dropwise, and the reaction mixture was stirred at room temperature for 18 h. Upon completion, the reaction mixture was poured into ice-water (120 mL) and adjusted to pH ~6. The resulting mixture was extracted with dichloromethane (3 × 30 mL), and the combined organic layers were concentrated under reduced pressure. The crude products were purified by column chromatography on silica gel using dichloromethane as the eluent to afford **1a** as a crimson red solid in 81% yield.

Chalcone **1b** ((2E,4E)-1-(2-methoxyphenyl)-5-(4-(dimethylamino)phenyl)penta-2,4-dien-1-one): Same procedure as **1a** except 2-methoxyacetophenone was used instead of acetophenone. Chalcone **1b** was isolated as an orange-red solid in 84% yield.

Chalcone **1c** ((2E,4E)-1-(4-methoxyphenyl)-5-(4-(dimethylamino)phenyl)penta-2,4-dien-1-one): Same procedure as **1a** except 4-methoxyacetophenone was used instead of acetophenone. Chalcone **1c** was isolated as an orange solid in 80% yield.

Chalcone **1d** ((2E,4E)-1-(2,4-dimethoxyphenyl)-5-(4-(dimethylamino)phenyl)penta-2,4-dien-1-one): Same procedure as **1a** except 2,4-dimethoxyacetophenone was used instead of acetophenone. Chalcone **1d** was isolated in 78% yield as a red solid.

Chalcone **1e** ((2E,4E)-1-(2,6-dimethoxyphenyl)-5-(4-(dimethylamino)phenyl)penta-2,4-dien-1-one): Same procedure as **1a** except 2,6-dimethoxyacetophenone was used instead of acetophenone. Chalcone **1e** was isolated in 74% yield as an orange solid.

Chalcone **1f** ((2E,4E)-1-(2,4,6-trimethoxyphenyl)-5-(4-(dimethylamino)phenyl)penta-2,4-dien-1-one): Same procedure as **1a** except 2,4,6-trimethoxyacetophenone was used instead of acetophenone. Chalcone **1f** was isolated as an orange solid in 75% yield.

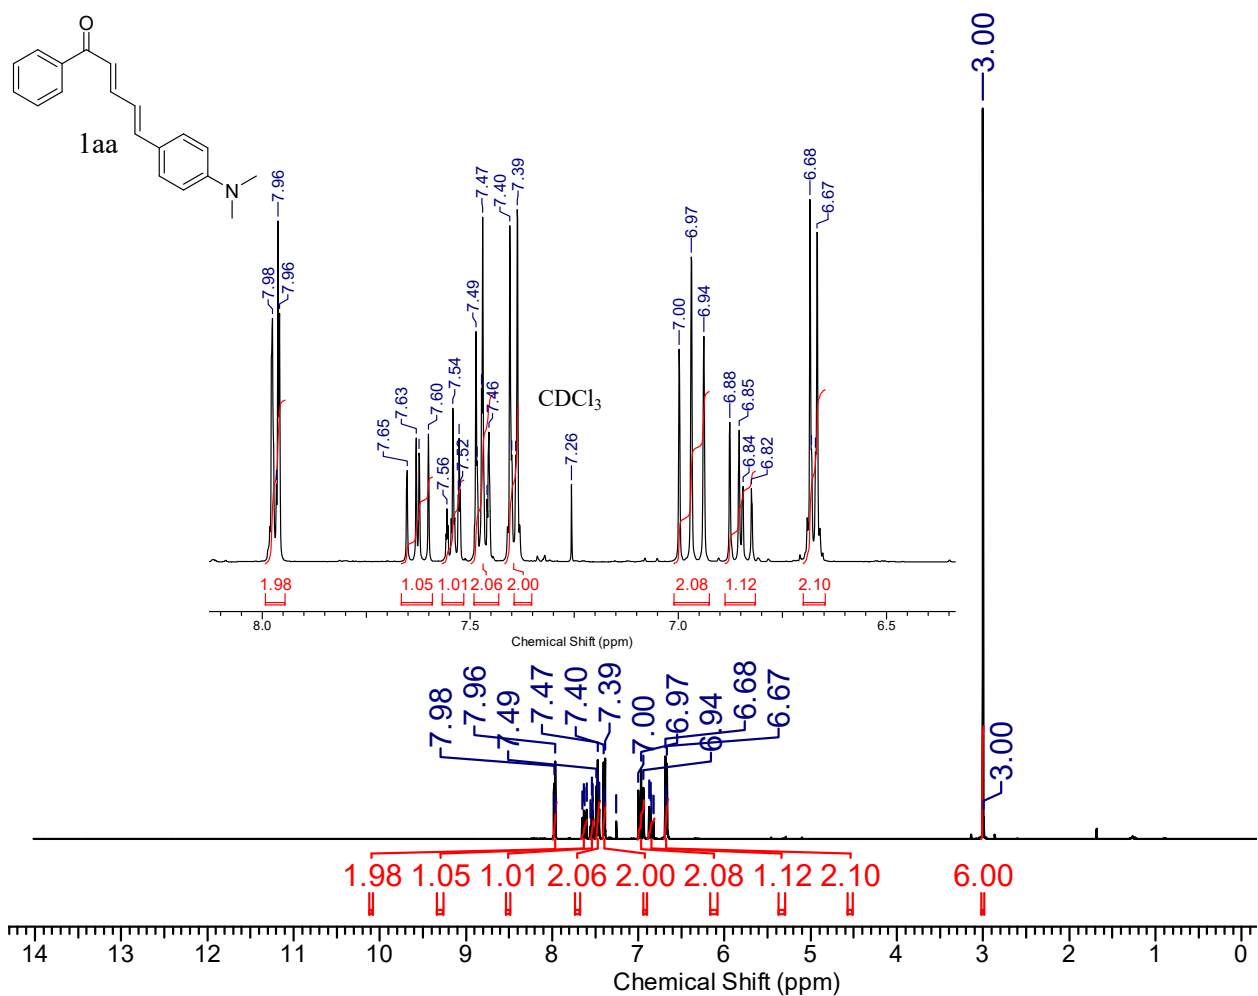

Figure S1. <sup>1</sup>H NMR of **1a** (500MHz, CDCl<sub>3</sub>) δ 7.98-7.96 (d, J = 6.85 Hz, 2H), 7.65-7.60 (dd, J = 14.48, 10.76 Hz 1H), 7.56-7.53 (t, J = 7.34 Hz, 1H), 7.49-7.46 (m, 2H), 7.40-7.39 (d, J = 8.80 Hz, 2H), 7.00-6.94 (t, J = 14.67 Hz, 2H), 6.88-6.82 (dd, J = 14.71, 10.27 Hz, 1H), 6.68-6.67 (d, J = 8.80 Hz, 2H), 3.00 (s, 6H, NMe<sub>2</sub>).

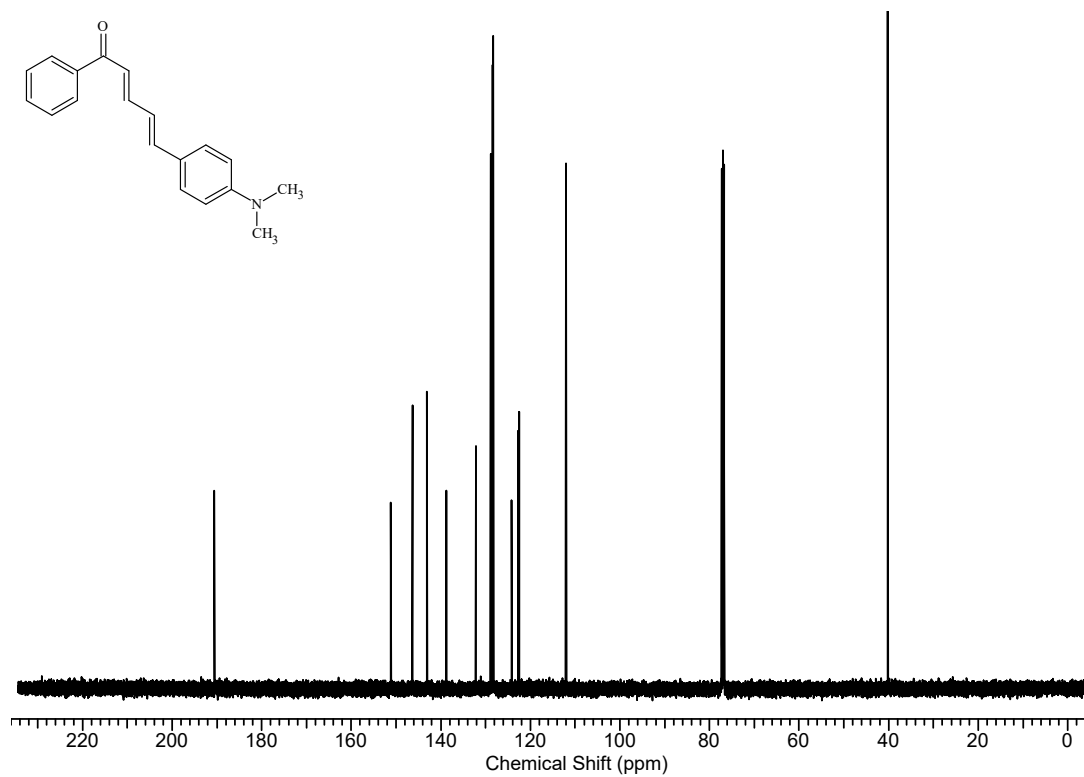

Figure S2.  $^{13}\text{C}$  NMR of **1a** (125 MHz,  $\text{CDCl}_3$ )  $\delta$  190.5, 151.1, 146.4, 143.1, 138.8, 132.2, 128.9, 128.4, 128.3, 124.2, 122.7, 122.5, 112.0, 40.2 ppm.

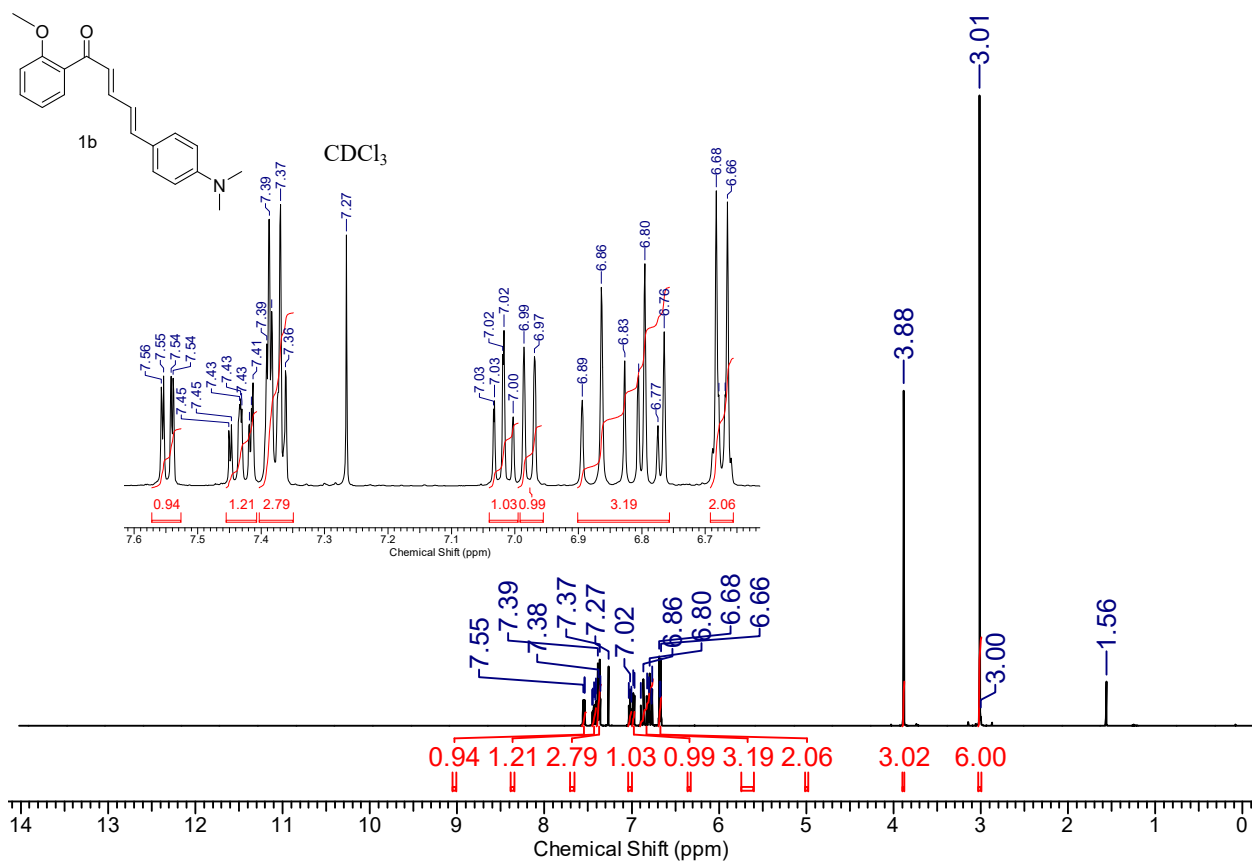

Figure S3. <sup>1</sup>H NMR of **1b** (500 MHz, CDCl<sub>3</sub>). δ 7.55 (dd, J = 7.5, 1.8 Hz, 1H), 7.45-7.37 (m, 4H), 7.02 (td, J = 7.5, 1.1 Hz, 1H), 6.98 (d, 8.1 Hz, 1H), 6.87 (d, J = 15.5 Hz, 1H), 6.83-6.80 (d, J = 15.5 Hz, 1H), 6.81-6.78 (d, J = 15.1 Hz, 1H), 6.67 (d, J = 10 Hz, 2H), 3.88 (s, 3H, OCH<sub>3</sub>), 3.01 (s, 6H, NMe<sub>2</sub>).

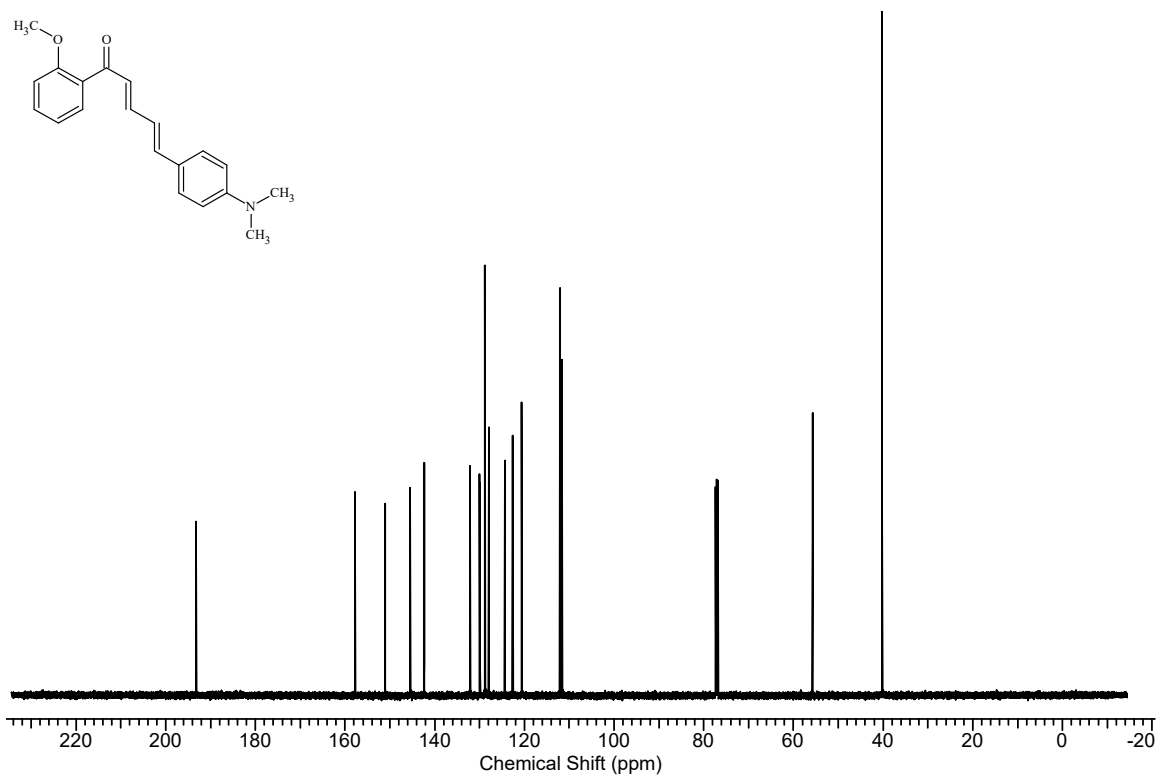

Figure S4.  $^{13}\text{C}$  NMR of **1b** (125 MHz,  $\text{CDCl}_3$ )  $\delta$  193.2, 157.8, 151.0, 145.5, 142.4, 132.1, 130.0, 129.9, 128.8, 127.9, 124.3, 122.6, 120.6, 112.0, 111.6, 55.7, 40.2 ppm.

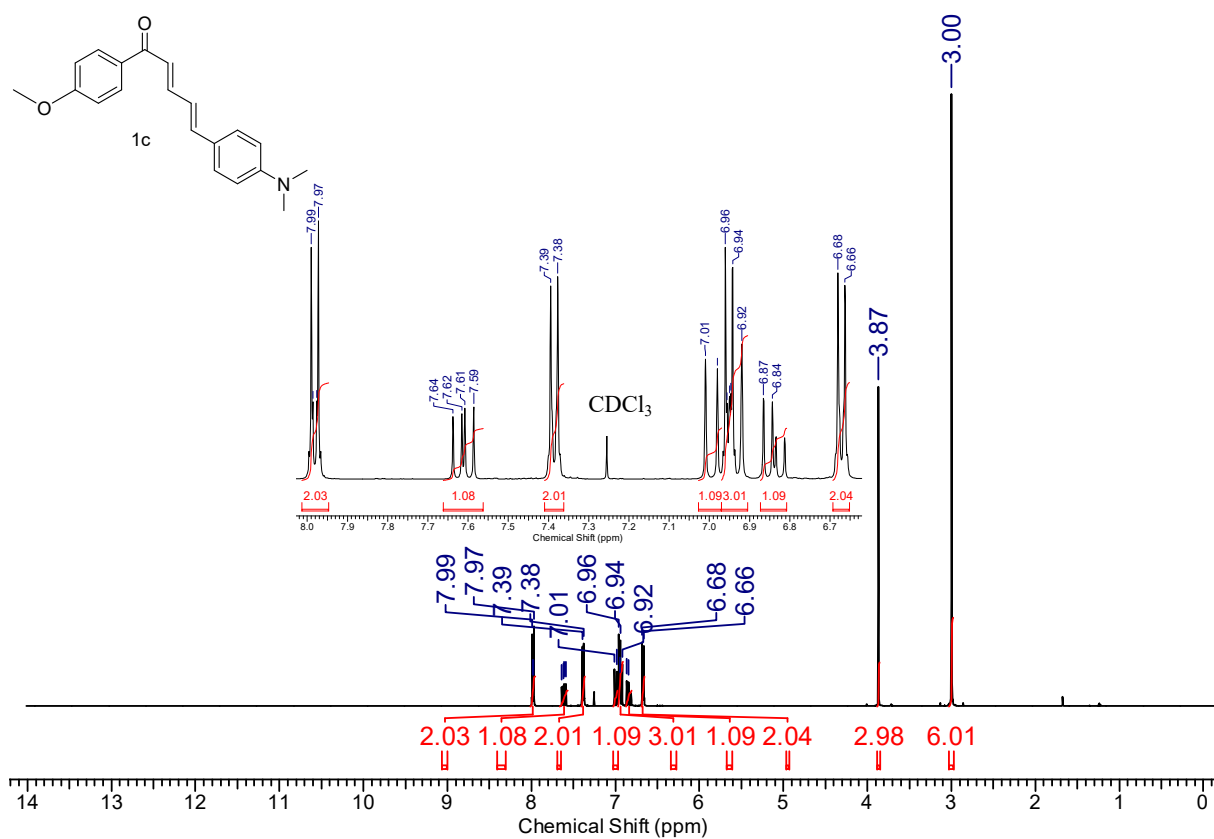

Figure S5. <sup>1</sup>H NMR of **1c** (500 MHz, CDCl<sub>3</sub>). δ 7.99-7.97 (d, J = 8.80 Hz, 2H), 7.64-7.59 (dd, J = 14.51, 11.25 Hz, 1H), 7.39-7.38 (d, J = 8.80 Hz, 2H), 7.01-6.98 (d, J = 14.67 Hz, 1H), 6.96-6.92 (m, 3H), 6.87-6.81 (dd, J = 15.06, 11.25 Hz, 1H), 6.68-6.66 (d, J = 8.80 Hz, 2H), 3.87 (s, 3H, OMe) 3.00 (s, 6H, NMe<sub>2</sub>).

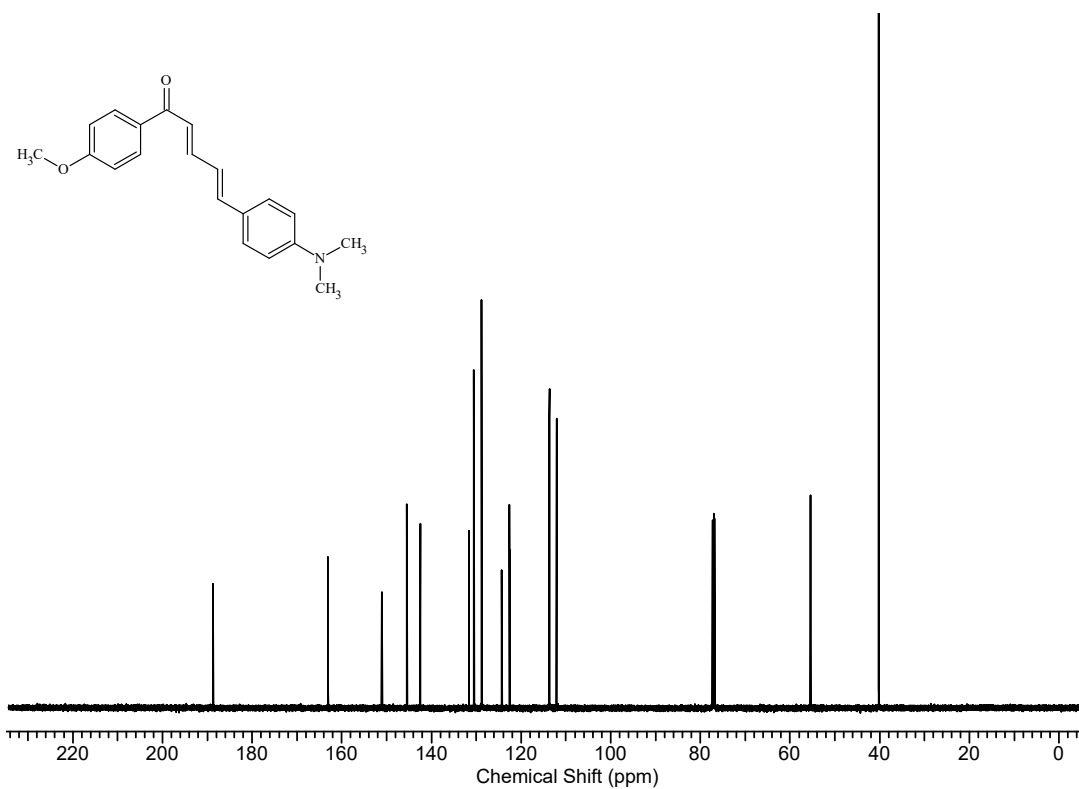

Figure S6.  $^{13}\text{C}$  NMR of **1c** (125 MHz,  $\text{CDCl}_3$ )  $\delta$  188.7, 163.0, 151.0, 145.5, 142.5, 131.6, 130.5, 128.8, 124.3, 122.6, 113.7, 112.1, 55.4, 40.2 ppm.

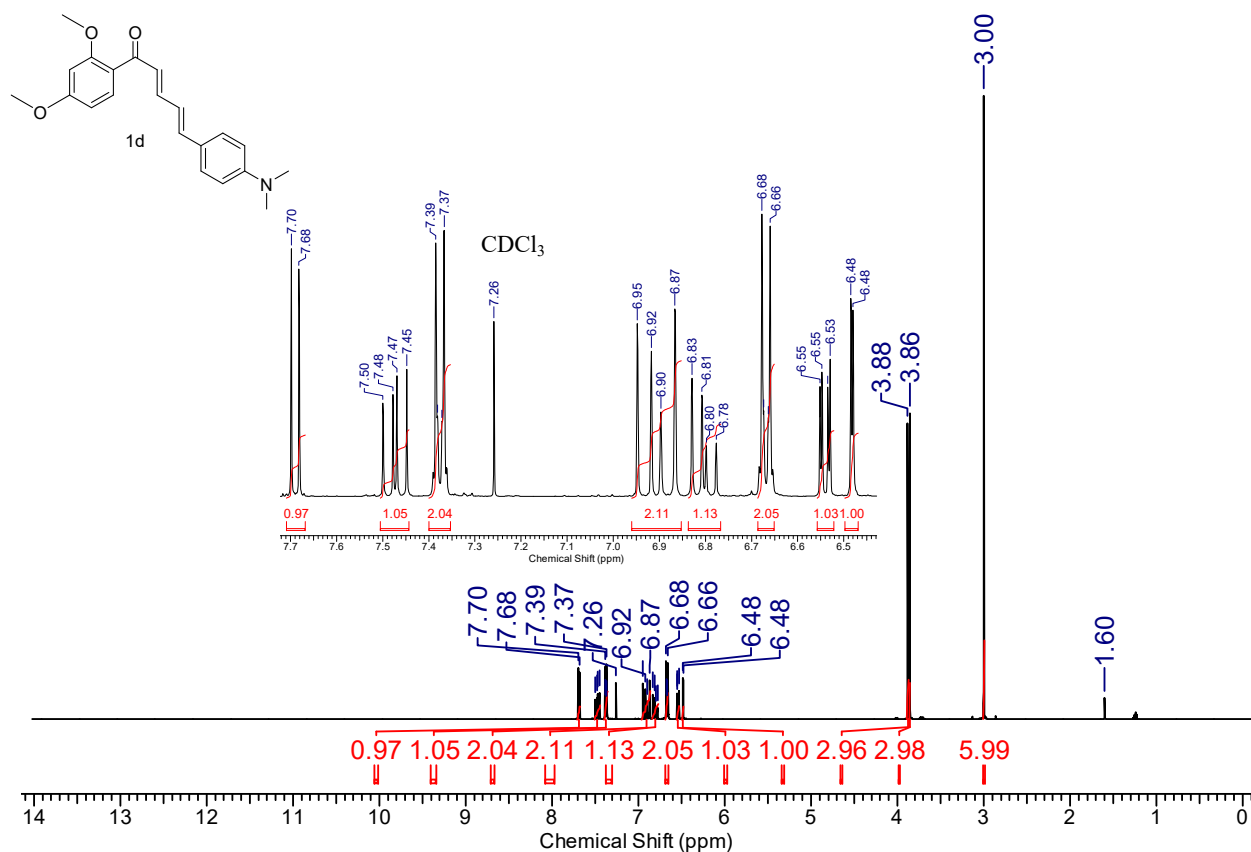

Figure S7. <sup>1</sup>H NMR of **1d** (500 MHz, CDCl<sub>3</sub>). δ 7.70-7.68 (d, J = 8.31 Hz, 1H) 7.50-7.45 (dd, J = 15.09, 10.76 Hz, 1H), 7.39-7.37 (d, J = 9.29 Hz, 2H), 6.95-6.87 (m, 2H), 6.83-6.78 (dd, J = 15.09, 10.76 Hz, 1H) 6.68-6.66 (d, J = 8.80 Hz, 2H), 6.55-6.53 (dd, J = 8.70, 1.96 Hz, 1H), 6.48 (d, J = 2.45 Hz, 1H), 3.88 (s, 3H, 2'-OMe), 3.86 (s, 3H, 4'-OMe), 3.00 (s, 6H, NMe<sub>2</sub>).

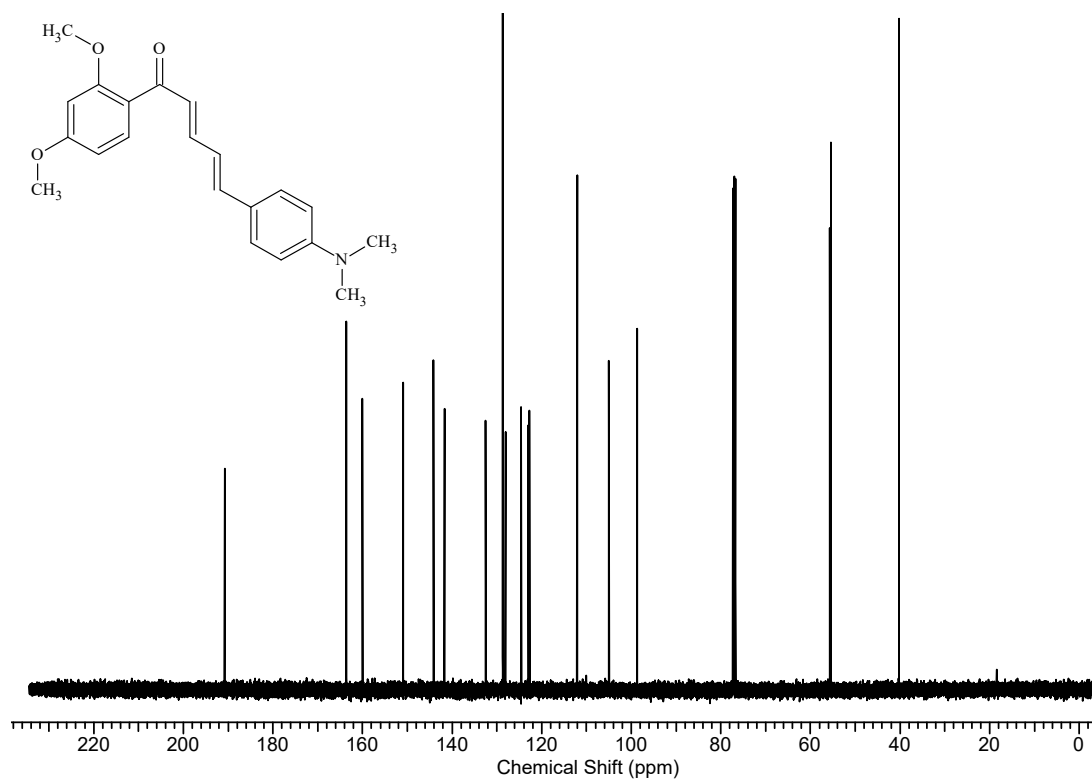

Figure S8. <sup>13</sup>C NMR of **1d** (125 MHz, CDCl<sub>3</sub>) δ 190.8, 163.7, 160.1, 150.9, 144.1, 141.7, 132.5, 128.7, 128.1, 124.6, 123.0, 122.7, 112.1, 105.0, 98.7, 55.7, 55.5, 40.2 ppm.

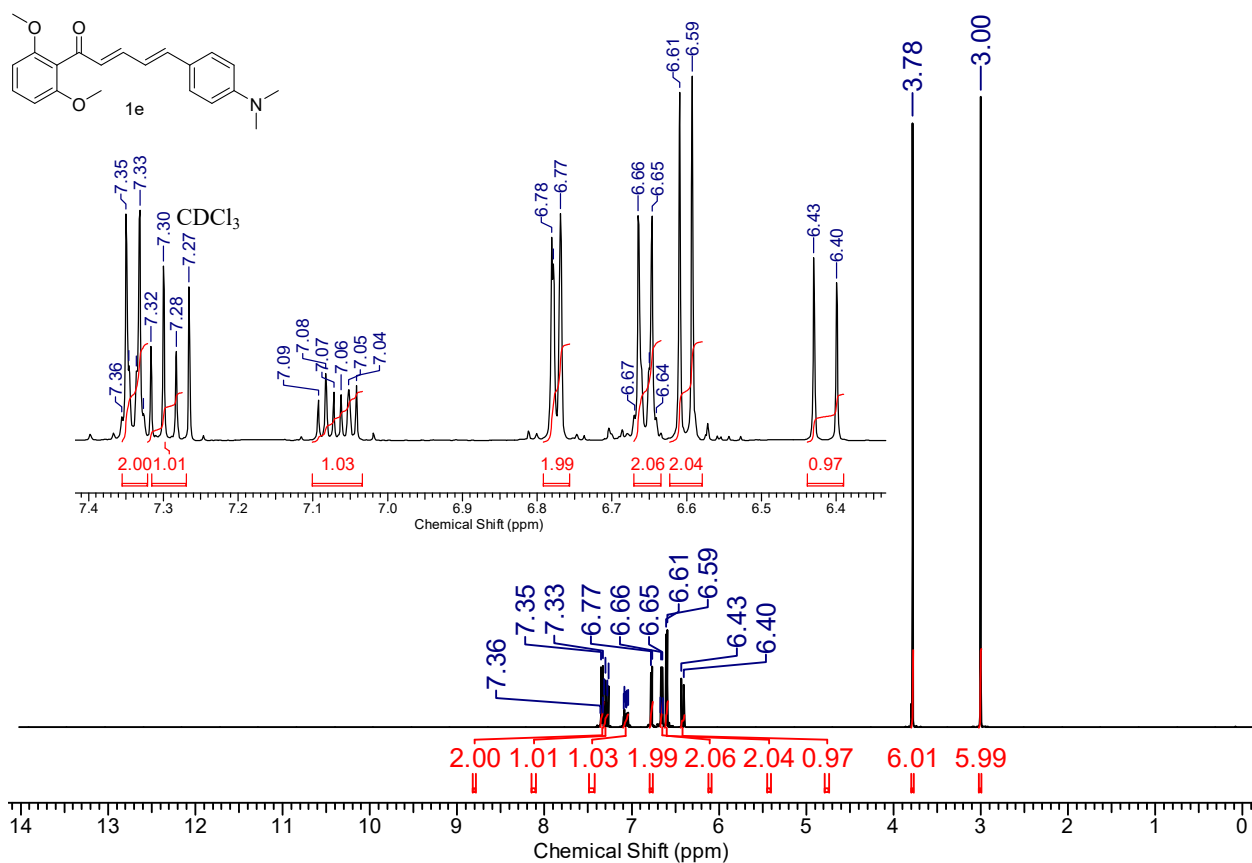

Figure S9. <sup>1</sup>H NMR of **1e** (500 MHz, CDCl<sub>3</sub>). δ 7.35-7.33 (d, J = 9.29 Hz, 2H), 7.30 (t, J = 8.31 Hz, 1H), 7.09-7.04 (dt, J = 15.16, 4.89 Hz, 1H), 6.78-6.77 (d, J = 4.89 Hz, 2H), 6.66-6.65 (d, J = 9.29 Hz, 2H), 6.61-6.59 (d, J = 8.31 Hz, 2H), 6.43-6.40 (d, J = 15.16 Hz, 1H), 3.78 (s, 6H, OMe), 3.00 (s, 6H, NMe<sub>2</sub>).

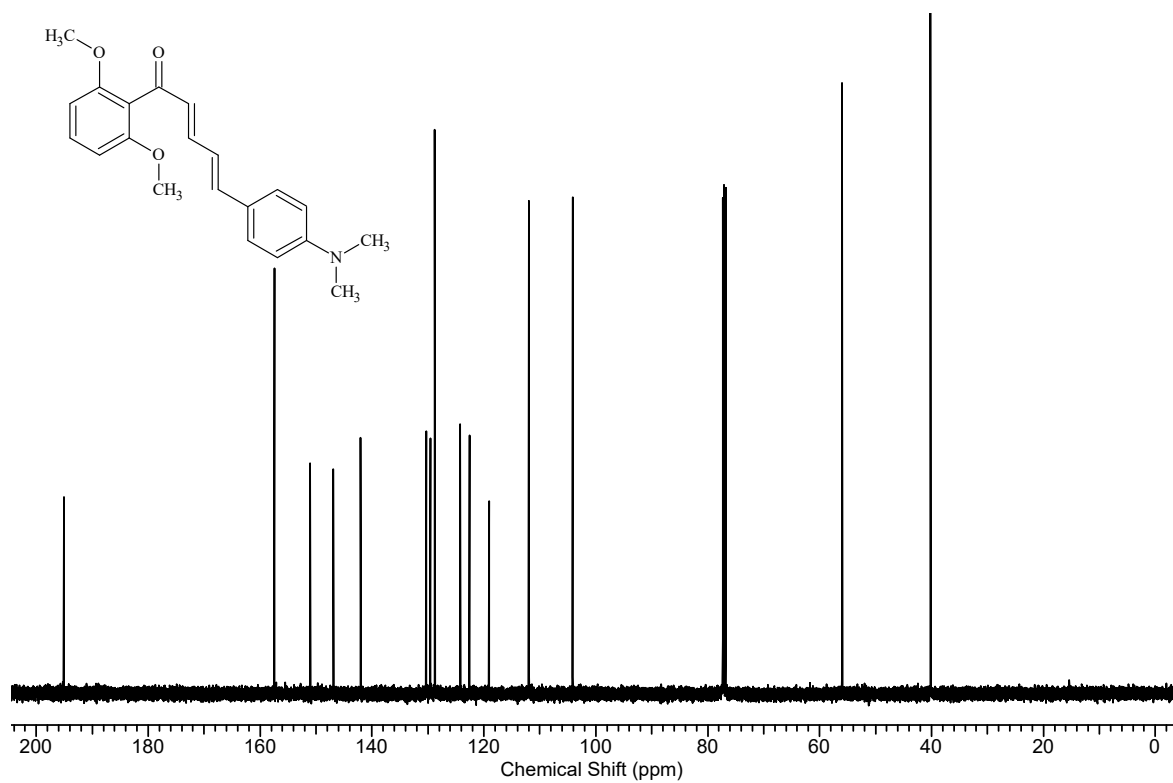

Figure S10.  $^{13}\text{C}$  NMR of **1e** (125 MHz,  $\text{CDCl}_3$ )  $\delta$  195.1, 157.5, 151.0, 146.9, 142.0 130.3, 129.6, 128.8, 124.4, 122.6, 119.0, 112.0, 104.1, 56.0, 40.2 ppm.

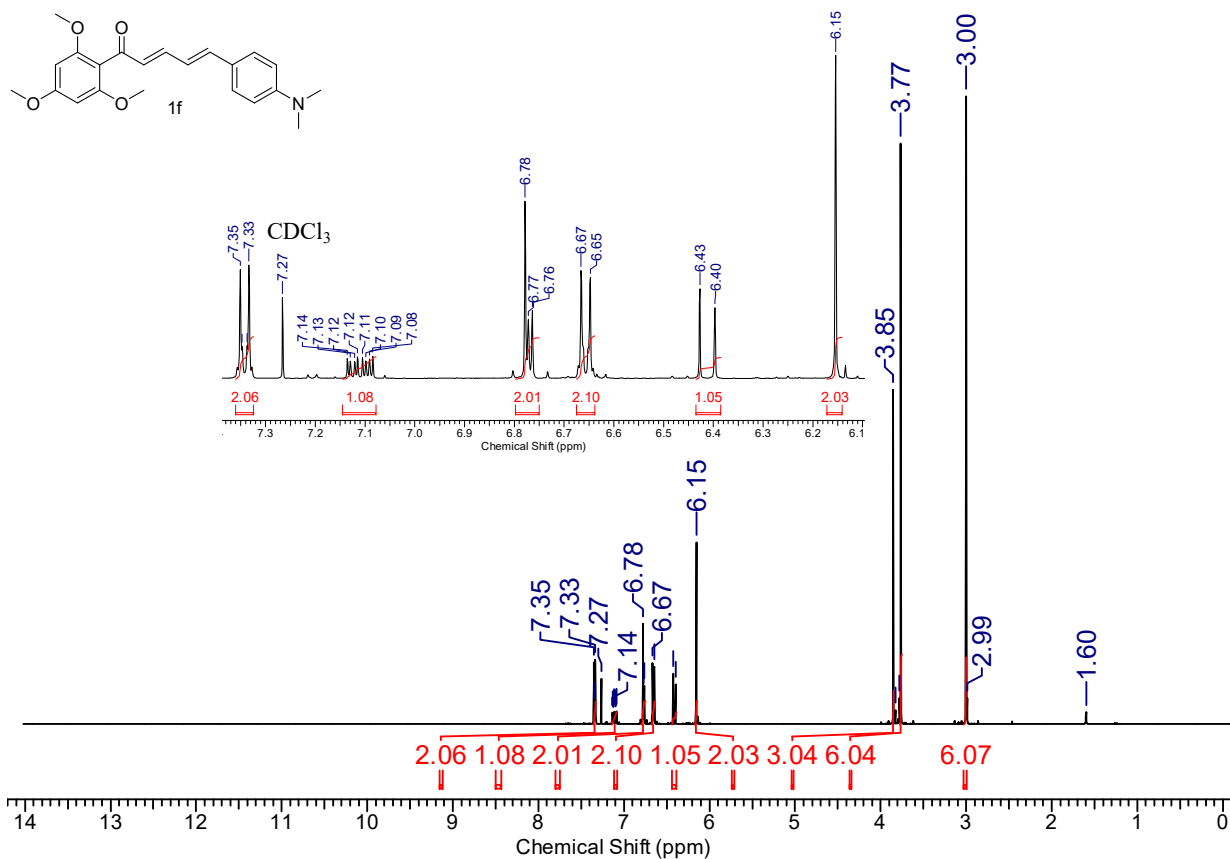

Figure S11. <sup>1</sup>H NMR of **1f** (500 MHz, CDCl<sub>3</sub>). δ 7.35-7.33 (d, *J* = 8.80 Hz, 2H), 7.14-7.08 (qd, *J* = 15.16, 7.29, 2.93 Hz, 1H), 6.78 (m, 2H), 6.67-6.65 (d, *J* = 9.29 Hz, 2H), 6.43-6.40 (d, *J* = 15.16 Hz, 1H), 6.15 (s, 2H), 3.85 (s, 3H, OMe), 3.77 (s, 6H, OMe), 3.00 (s, 6H, NMe<sub>2</sub>).

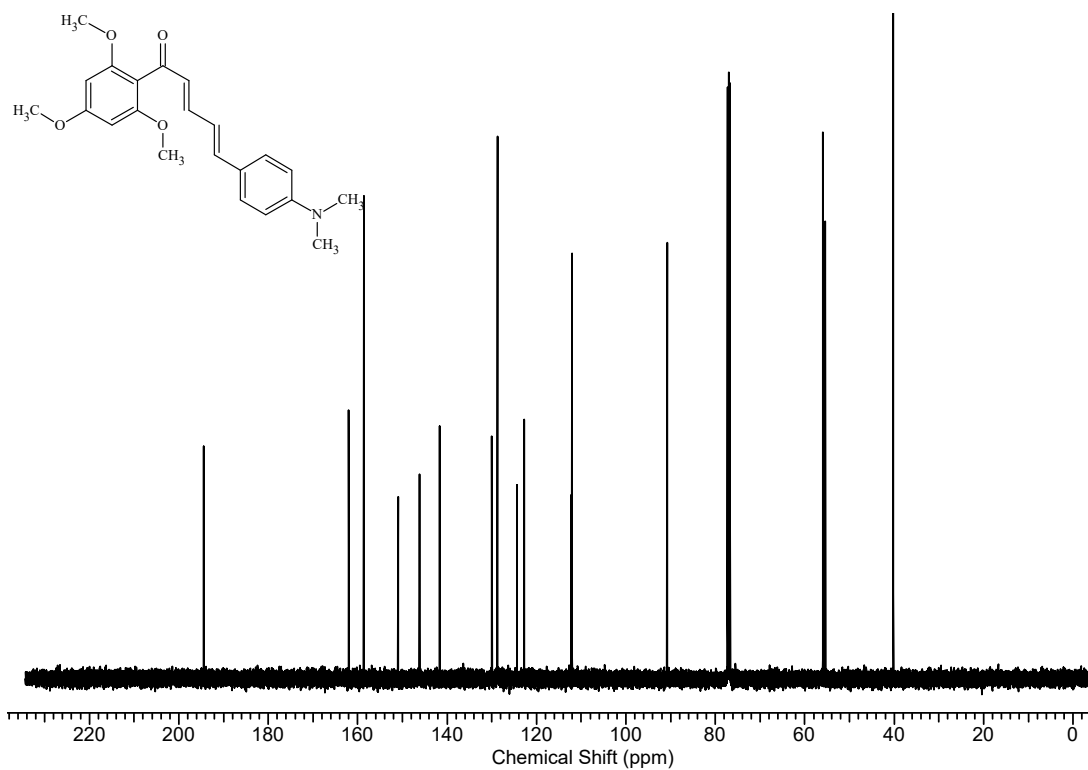

Figure S12.  $^{13}\text{C}$  NMR of **1f** (125 MHz,  $\text{CDCl}_3$ )  $\delta$  194.4, 162.0, 158.6, 151.0, 146.2, 141.7, 130.0, 128.7, 124.4, 122.7, 112.3, 112.0, 90.8, 55.9, 55.9, 40.2 ppm.

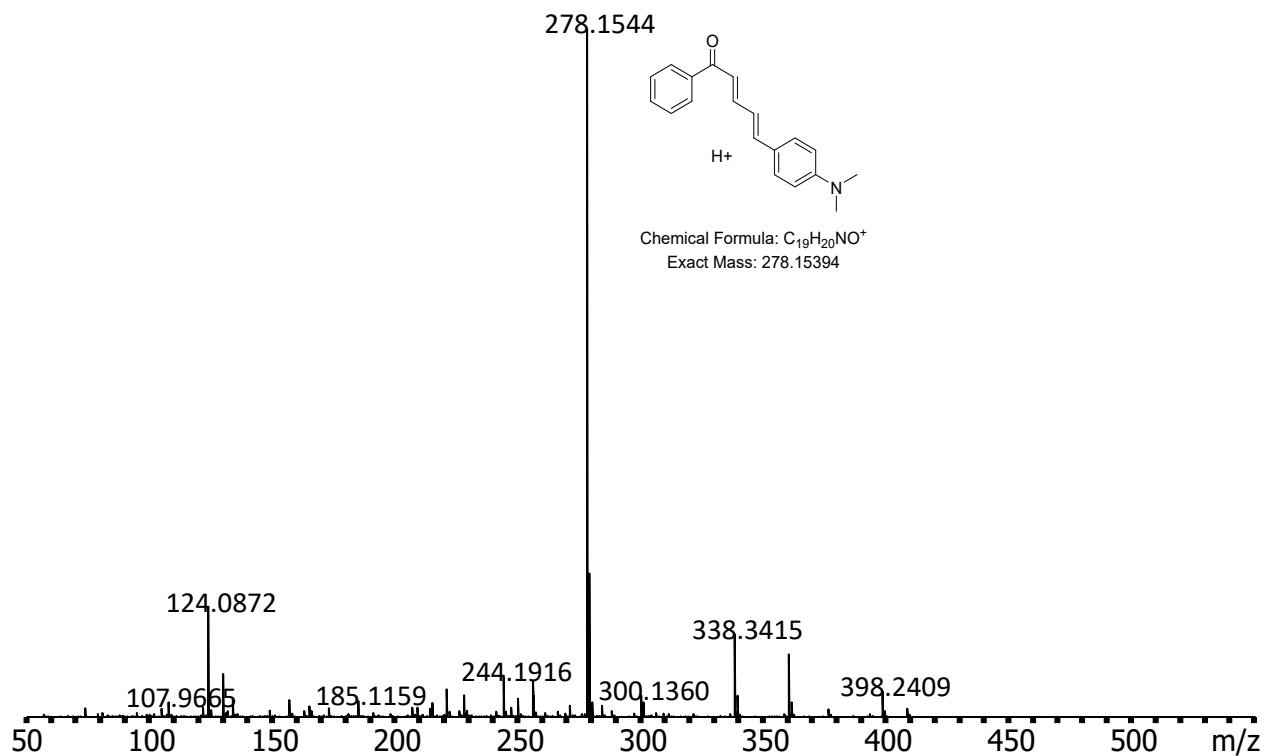

Figure S13. ESI-MS of **1a** in ACN.

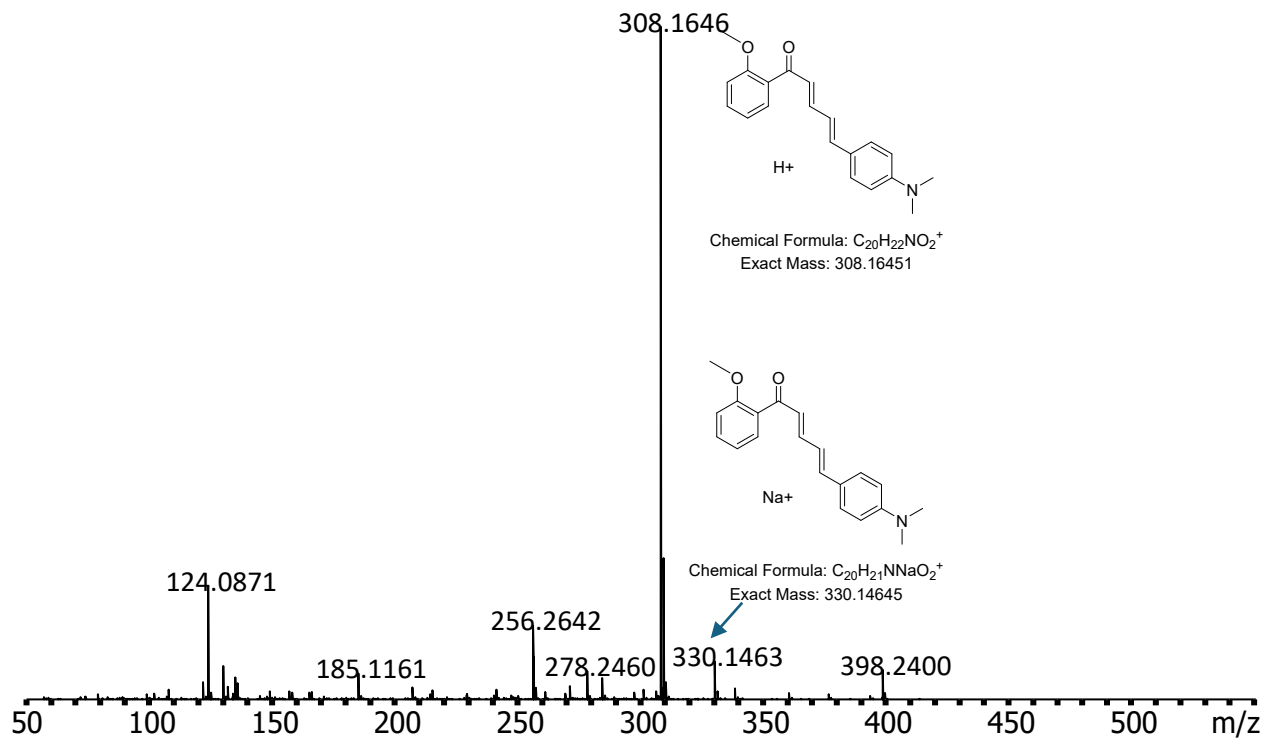

Figure S14. ESI-MS of **1b** in ACN.

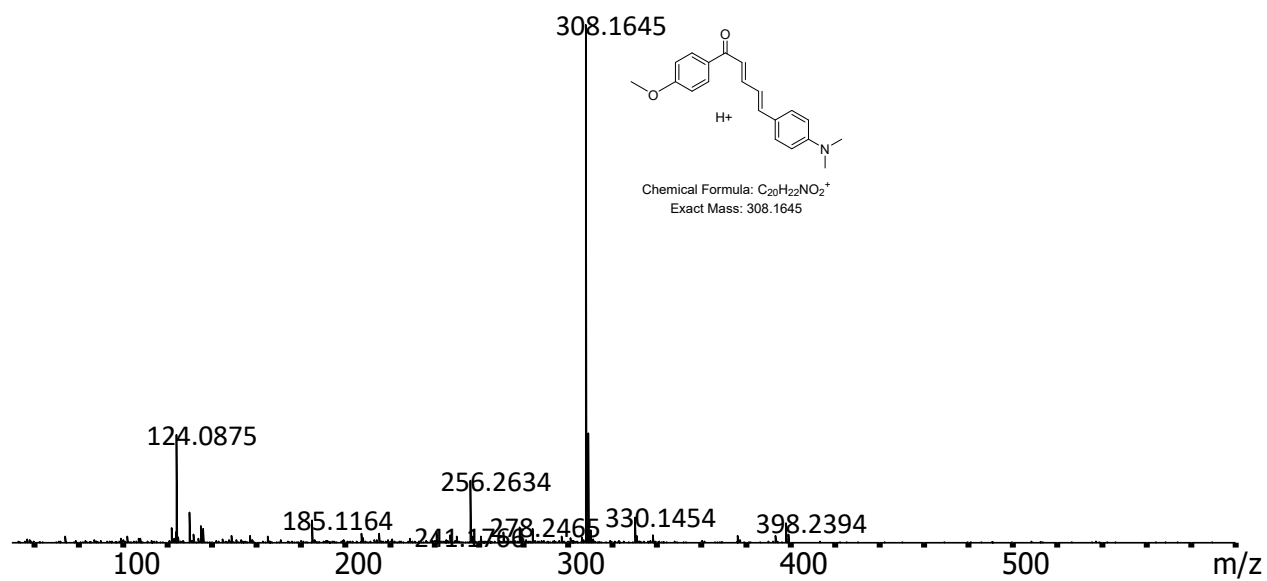

Figure S15. ESI-MS of **1c** in ACN.

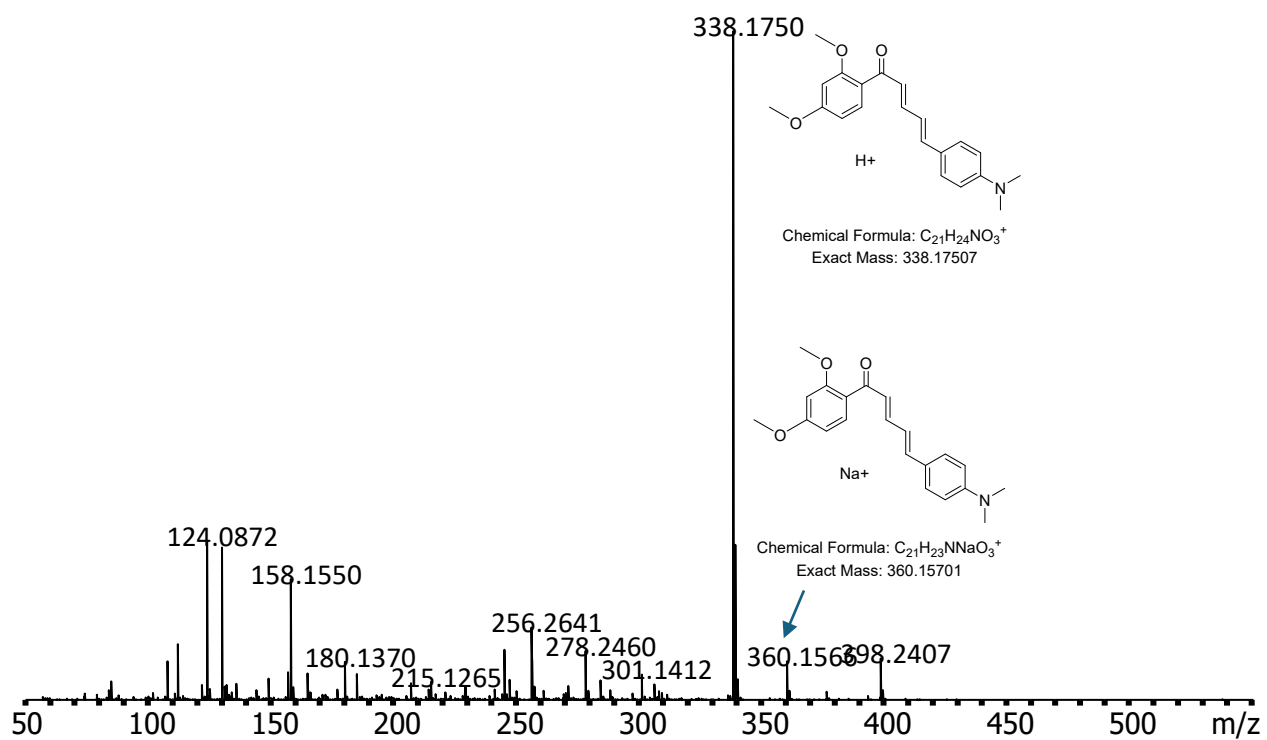

Figure S16. ESI-MS of **1d** in ACN.

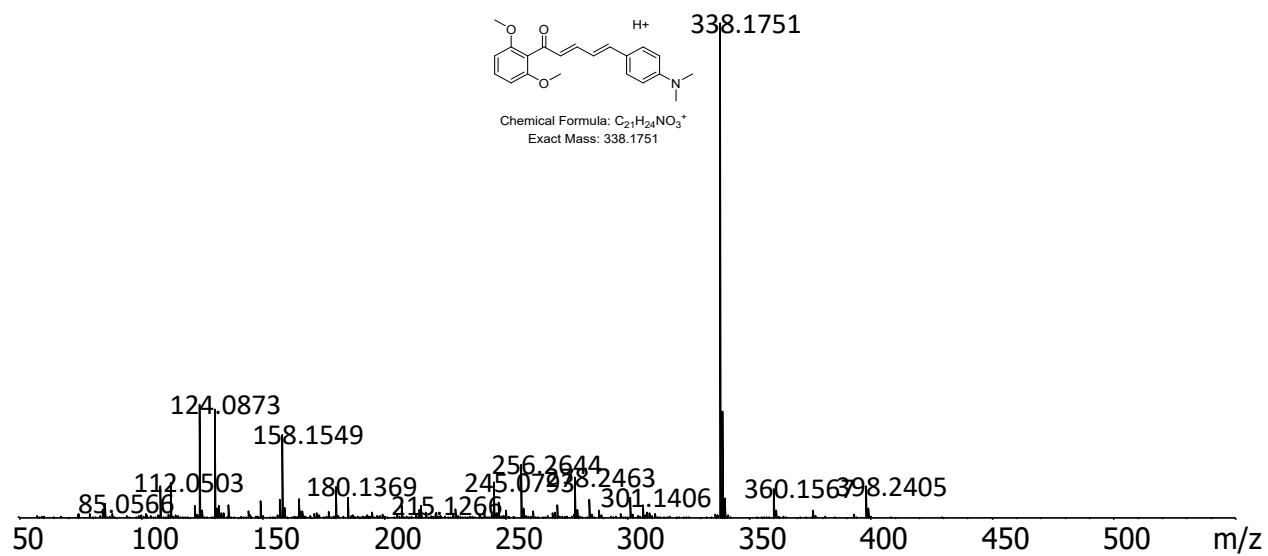

Figure S17. ESI-MS of **1e** in ACN.

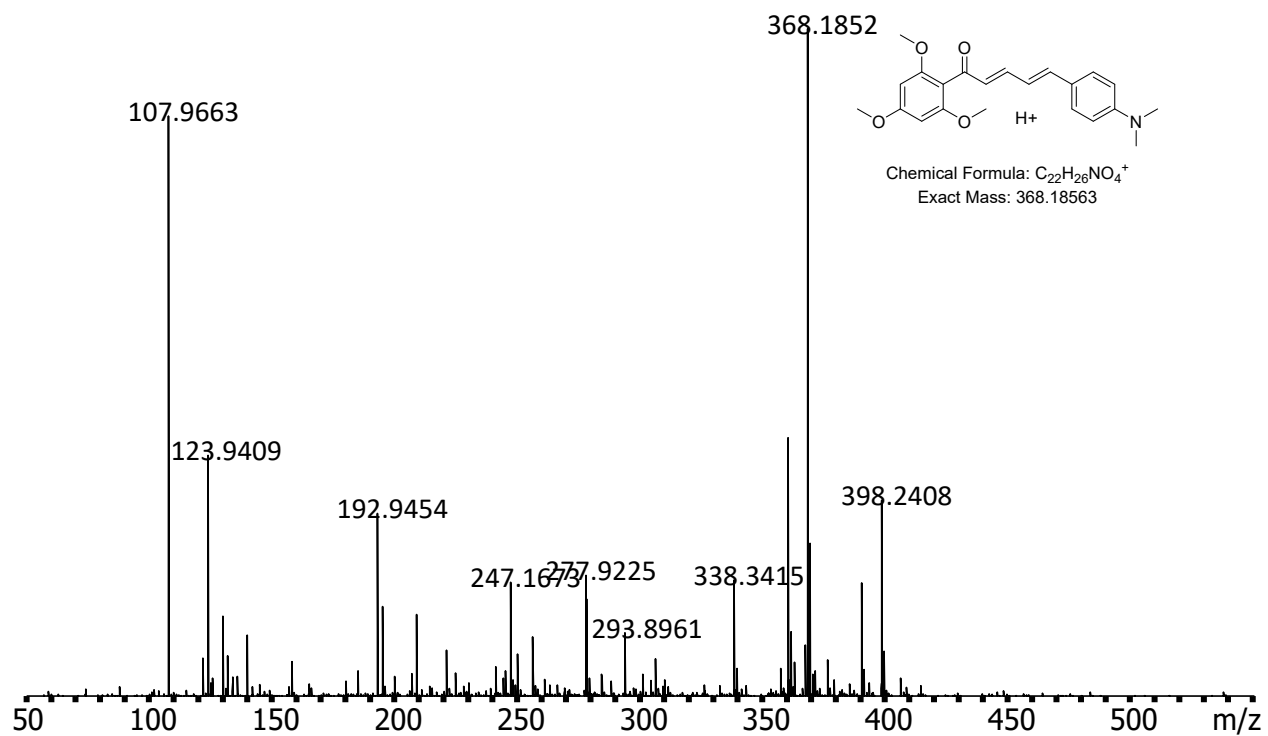

Figure S18. ESI-MS of **1f** in ACN.

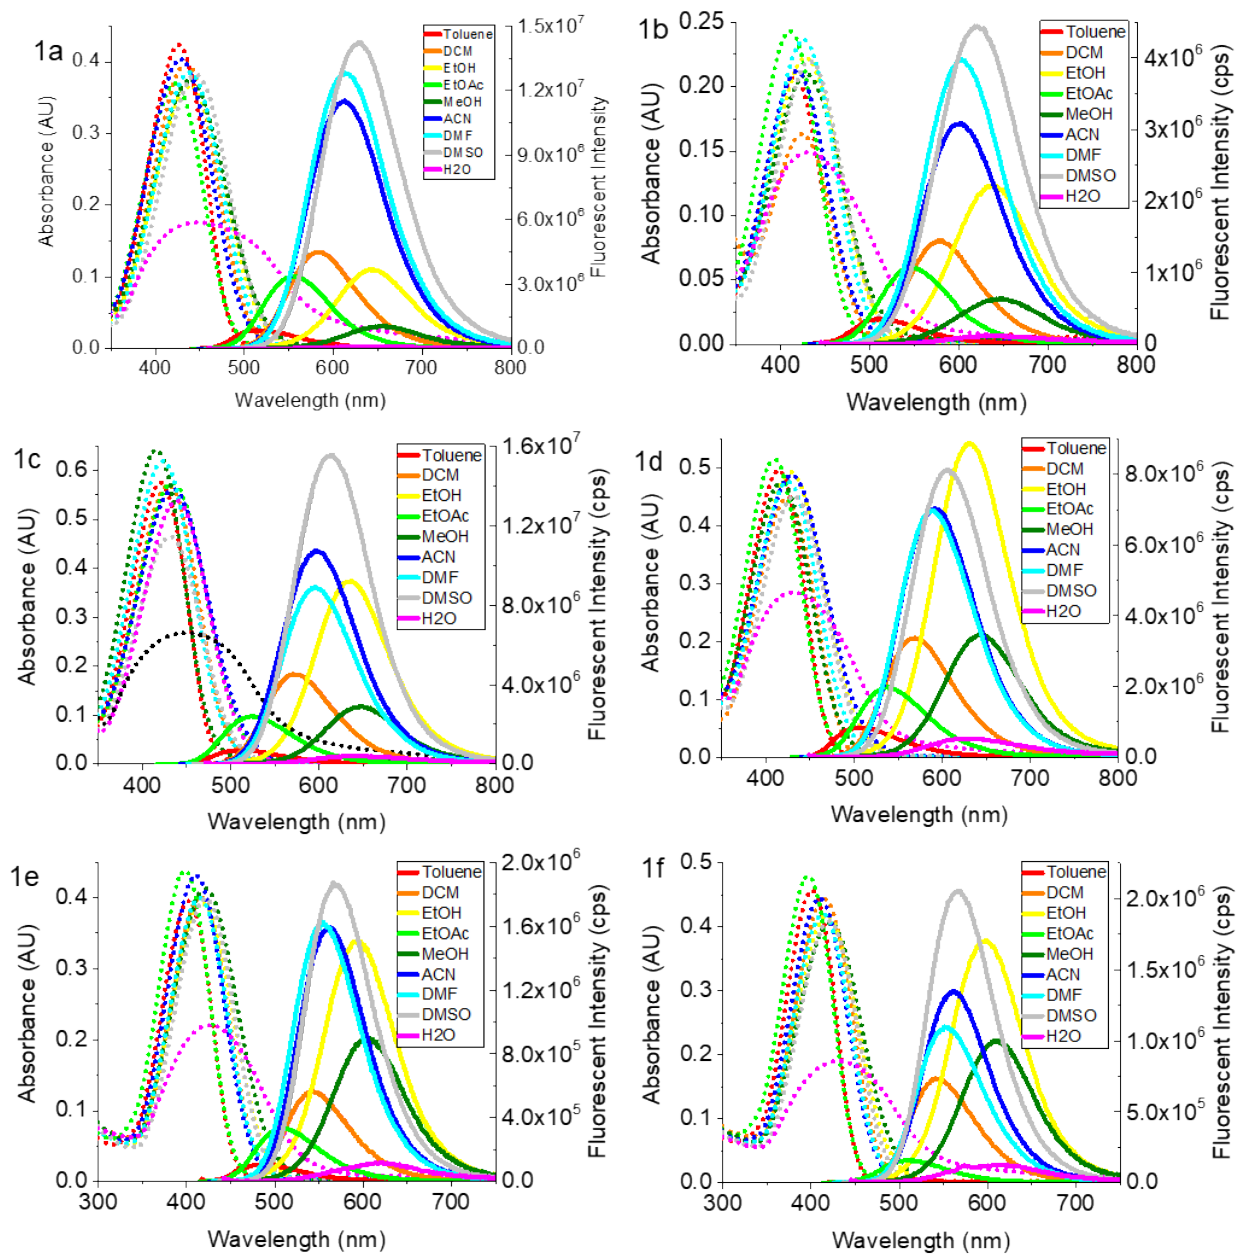

Figure S19. Absorbance (dotted lines) and emission (solid lines) spectra of **1a–1f** at 10  $\mu\text{M}$  in various organic solvents.

Table S1. Optical properties of **1a–1f** (10  $\mu$ M) in various organic solvents.

| Compound  | Solvent | $\lambda_{\text{abs}}$ (nm) | $\lambda_{\text{Em}}$ (nm) | $\Phi_{\text{f}}$ | $\epsilon$ ( $\text{M}^{-1}\text{cm}^{-1}$ ) | $\Delta\lambda$ (nm) |
|-----------|---------|-----------------------------|----------------------------|-------------------|----------------------------------------------|----------------------|
| <b>1a</b> | Toluene | 426                         | 518                        | 0.019             | 42,405                                       | 92                   |
|           | DCM     | 437                         | 586                        | 0.119             | 39,753                                       | 149                  |
|           | EtOH    | 438                         | 645                        | 0.084             | 36,598                                       | 207                  |
|           | EtOAc   | 424                         | 556                        | 0.059             | 36,985                                       | 132                  |
|           | MeOH    | 440                         | 658                        | 0.032             | 37,435                                       | 218                  |
|           | ACN     | 429                         | 612                        | 0.301             | 40,383                                       | 183                  |
|           | DMF     | 439                         | 615                        | 0.346             | 38,587                                       | 176                  |
|           | DMSO    | 446                         | 630                        | 0.354             | 38,239                                       | 184                  |
| H2O       | 445     | 640                         | 0.009                      | 17,640            | 195                                          |                      |
| <b>1b</b> | Toluene | 415                         | 510                        | 0.019             | 41,370                                       | 95                   |
|           | DCM     | 424                         | 580                        | 0.063             | 32,640                                       | 156                  |
|           | EtOH    | 429                         | 640                        | 0.128             | 44,492                                       | 211                  |
|           | EtOAc   | 410                         | 547                        | 0.050             | 48,632                                       | 137                  |
|           | MeOH    | 430                         | 650                        | 0.041             | 41,916                                       | 220                  |
|           | ACN     | 418                         | 601                        | 0.160             | 42,406                                       | 183                  |
|           | DMF     | 426                         | 604                        | 0.204             | 47,226                                       | 178                  |
|           | DMSO    | 433                         | 621                        | 0.283             | 44,010                                       | 188                  |
| H2O       | 435     | 635                         | 0.008                      | 29,790            | 200                                          |                      |
| <b>1c</b> | Toluene | 424                         | 510                        | 0.015             | 57,497                                       | 86                   |
|           | DCM     | 429                         | 572                        | 0.117             | 56,978                                       | 143                  |
|           | EtOH    | 435                         | 637                        | 0.176             | 57,452                                       | 202                  |
|           | EtOAc   | 415                         | 547                        | 0.038             | 64,171                                       | 132                  |
|           | MeOH    | 433                         | 647                        | 0.044             | 56,180                                       | 214                  |
|           | ACN     | 424                         | 598                        | 0.205             | 61,902                                       | 174                  |
|           | DMF     | 432                         | 595                        | 0.178             | 46,521                                       | 163                  |
|           | DMSO    | 440                         | 615                        | 0.301             | 53,814                                       | 175                  |
| H2O       | 455     | 641                         | 0.007                      | 26,874            | 186                                          |                      |
| <b>1d</b> | Toluene | 415                         | 508                        | 0.019             | 49,618                                       | 93                   |
|           | DCM     | 424                         | 570                        | 0.076             | 44,579                                       | 146                  |
|           | EtOH    | 428                         | 630                        | 0.213             | 49,250                                       | 202                  |
|           | EtOAc   | 412                         | 536                        | 0.035             | 51,499                                       | 124                  |
|           | MeOH    | 419                         | 646                        | 0.075             | 47,530                                       | 227                  |
|           | ACN     | 428                         | 593                        | 0.130             | 48,661                                       | 165                  |
|           | DMF     | 425                         | 589                        | 0.124             | 47,585                                       | 164                  |
|           | DMSO    | 433                         | 607                        | 0.245             | 45,116                                       | 174                  |
| H2O       | 432     | 630                         | 0.008                      | 28,522            | 198                                          |                      |
| <b>1e</b> | Toluene | 402                         | 486                        | 0.004             | 39,553                                       | 84                   |
|           | DCM     | 417                         | 543                        | 0.015             | 40,106                                       | 126                  |
|           | EtOH    | 420                         | 595                        | 0.038             | 39,232                                       | 175                  |
|           | EtOAc   | 399                         | 507                        | 0.007             | 43,796                                       | 108                  |
|           | MeOH    | 420                         | 605                        | 0.021             | 41,336                                       | 185                  |
|           | ACN     | 410                         | 562                        | 0.029             | 43,126                                       | 152                  |
|           | DMF     | 416                         | 555                        | 0.032             | 39,975                                       | 139                  |
|           | DMSO    | 421                         | 570                        | 0.053             | 39,908                                       | 149                  |
| H2O       | 430     | 622                         | 0.003                      | 22,039            | 192                                          |                      |
| <b>1f</b> | Toluene | 400                         | 492                        | 0.001             | 45,722                                       | 92                   |
|           | DCM     | 415                         | 542                        | 0.013             | 44,496                                       | 127                  |
|           | EtOH    | 418                         | 600                        | 0.048             | 41,842                                       | 182                  |
|           | EtOAc   | 397                         | 510                        | 0.004             | 48,052                                       | 113                  |
|           | MeOH    | 422                         | 610                        | 0.024             | 40,685                                       | 188                  |
|           | ACN     | 408                         | 561                        | 0.026             | 44,458                                       | 153                  |
|           | DMF     | 414                         | 552                        | 0.027             | 42,076                                       | 138                  |
|           | DMSO    | 420                         | 568                        | 0.048             | 40,963                                       | 148                  |
| H2O       | 433     | 613                         | 0.004                      | 19,081            | 180                                          |                      |

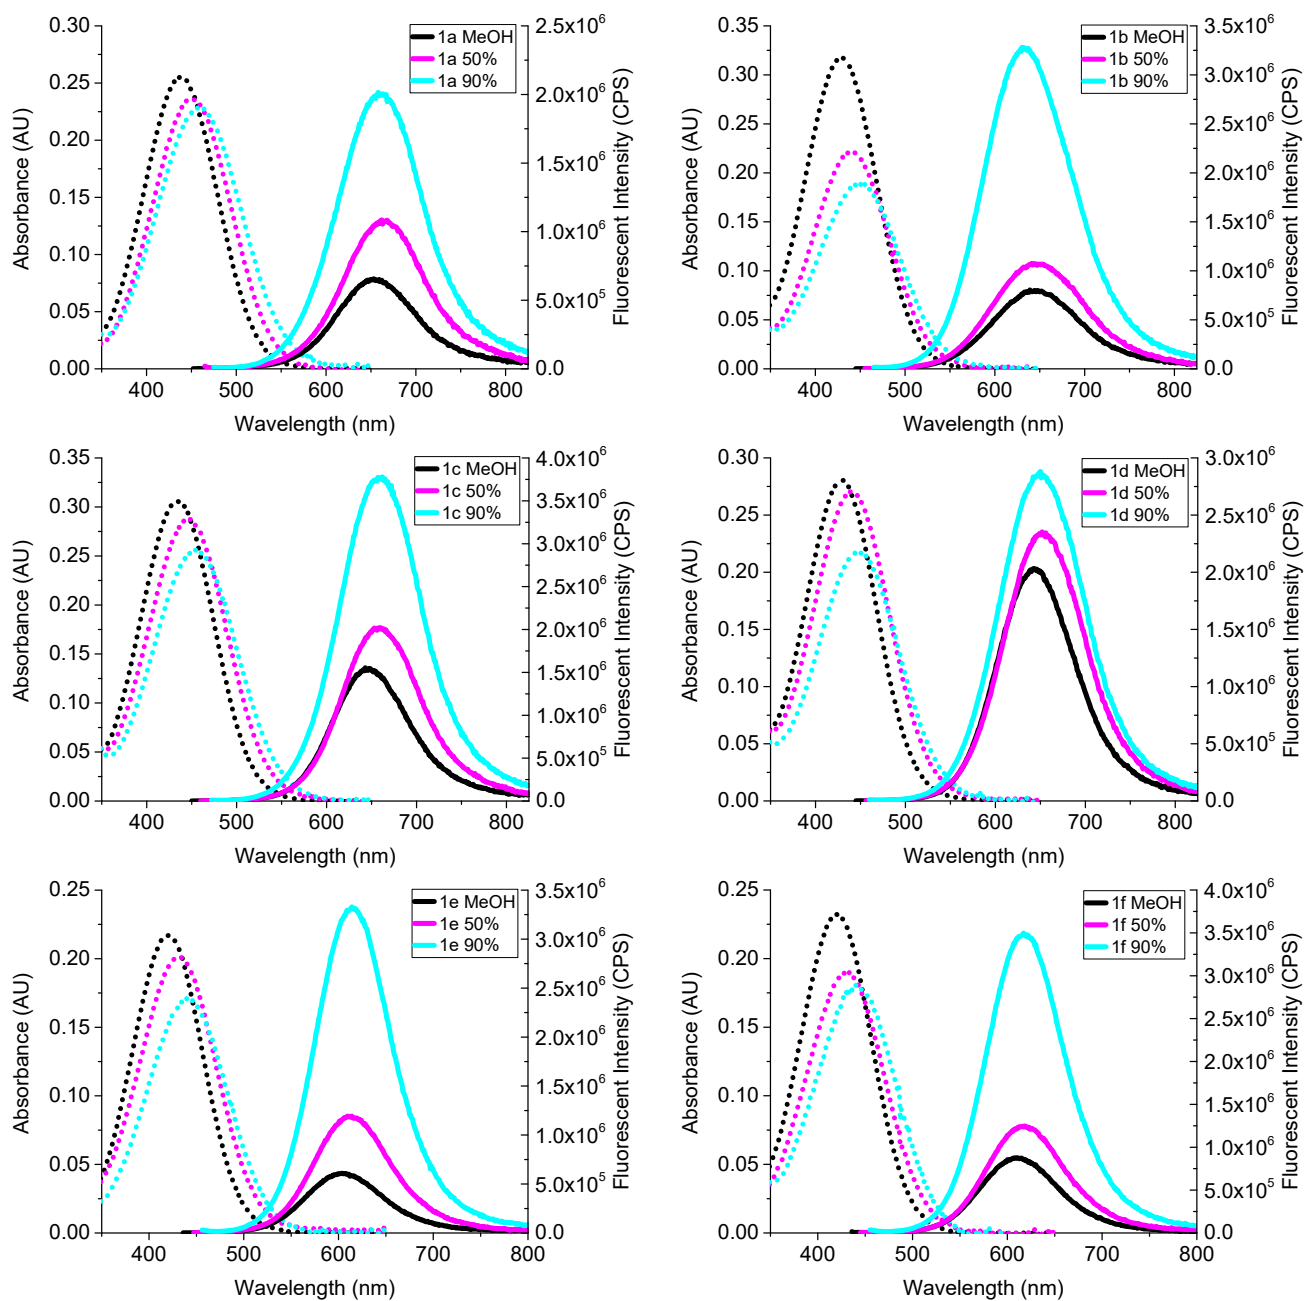

Figure S20. Absorption (dotted lines, left axis) and fluorescence emission spectra (solid lines, right axis) of compounds **1a–1f** (5 $\mu$ M) recorded in MeOH and MeOH/glycerol mixtures of increasing viscosity (50% and 90% v/v glycerol).

Table S2. Photophysical properties of **1a-1f** (5  $\mu$ M) in 90:10 glycerol/MeOH.

| Compound  | $\lambda_{\text{abs}}$ (nm) | $\lambda_{\text{Em}}$ (nm) | $\Phi_{\text{fl}}$ | $\Delta\lambda$ (nm) |
|-----------|-----------------------------|----------------------------|--------------------|----------------------|
| <b>1a</b> | 457                         | 661                        | 0.146              | 204                  |
| <b>1b</b> | 450                         | 633                        | 0.202              | 183                  |
| <b>1c</b> | 455                         | 660                        | 0.214              | 205                  |
| <b>1d</b> | 449                         | 650                        | 0.209              | 201                  |
| <b>1e</b> | 441                         | 615                        | 0.222              | 174                  |
| <b>1f</b> | 441                         | 617                        | 0.235              | 176                  |

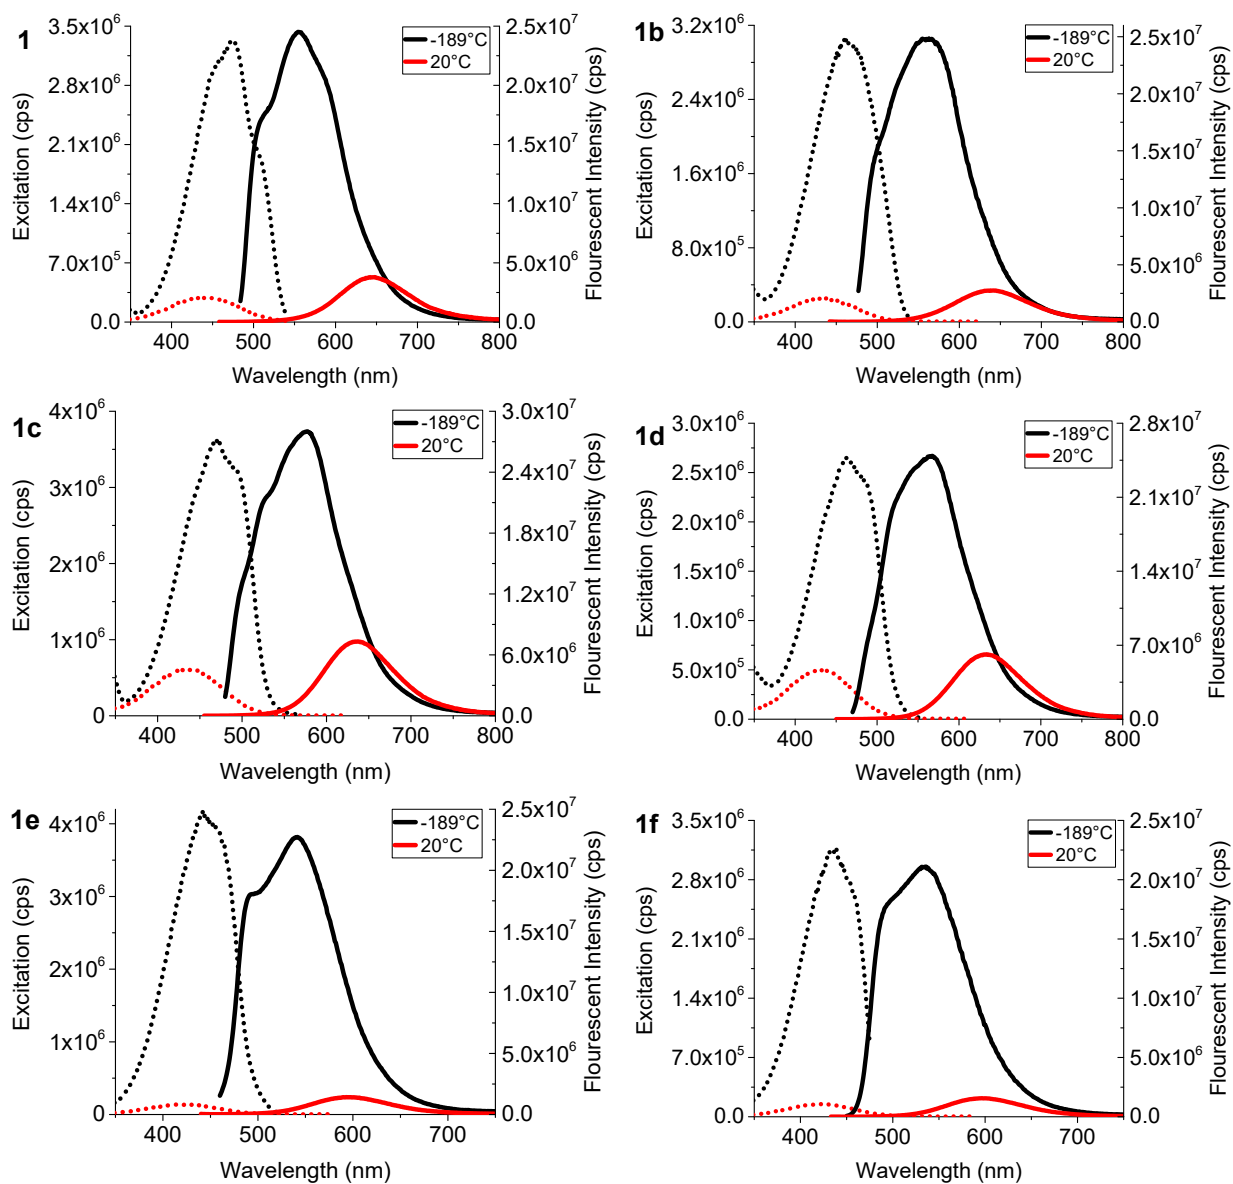

Figure S21. Excitation (dotted lines) and emission (solid lines) of **1a-1f** in EtOH at -189°C (black) and room temperature (red).

Table S3. Fluorescence lifetimes ( $\tau_1$ ,  $\tau_2$ ), pre-exponential amplitude contributions ( $\alpha_1$ ,  $\alpha_2$ ), intensity-weighted average lifetimes ( $\bar{\tau}$ ), and goodness-of-fit values ( $\chi^2$ ) for compounds **1a–1f** measured in solution at room temperature. All decay profiles were best fit using a bi-exponential model.

| Compound  | Solvent | $\tau_1$ (ns) | $\alpha_1$ (%) | $\tau_2$ (ns) | $\alpha_2$ (%) | $\bar{\tau}$ (ns) | $\chi^2$ |
|-----------|---------|---------------|----------------|---------------|----------------|-------------------|----------|
| <b>1a</b> | DCM     | 0.453         | 31             | 0.635         | 69             | 0.59              | 1.21     |
|           | EtOH    | 0.180         | 10             | 0.434         | 90             | 0.41              | 1.18     |
|           | ACN     | 0.690         | 10             | 1.285         | 90             | 1.23              | 1.21     |
| <b>1b</b> | DCM     | 0.197         | 21             | 0.564         | 79             | 0.52              | 1.12     |
|           | EtOH    | 0.586         | 13             | 0.694         | 87             | 0.69              | 1.03     |
|           | ACN     | 0.207         | 7              | 1.091         | 93             | 1.07              | 1.04     |
| <b>1c</b> | DCM     | 0.344         | 74             | 0.560         | 26             | 0.41              | 1.16     |
|           | EtOH    | 0.166         | 5              | 0.793         | 95             | 0.79              | 1.02     |
|           | ACN     | 0.504         | 9              | 0.913         | 91             | 0.90              | 1.11     |
| <b>1d</b> | DCM     | 0.312         | 86             | 0.588         | 14             | 0.34              | 1.17     |
|           | EtOH    | 0.601         | 11             | 0.969         | 89             | 0.96              | 1.20     |
|           | ACN     | 0.438         | 15             | 0.801         | 85             | 0.76              | 1.22     |
| <b>1e</b> | DCM     | 0.054         | 51             | 0.110         | 49             | 0.083             | 0.93     |
|           | EtOH    | 0.250         | 72             | 0.450         | 28             | 0.32              | 0.92     |
|           | ACN     | 0.170         | 95             | 0.600         | 5              | 0.19              | 0.89     |
| <b>1f</b> | DCM     | 0.051         | 52             | 0.110         | 48             | 0.081             | 0.99     |
|           | EtOH    | 0.280         | 47             | 0.500         | 47             | 0.39              | 1.19     |
|           | ACN     | 0.150         | 83             | 0.320         | 17             | 0.17              | 1.07     |

Table S4. X-Ray crystallography information for **1a-1f**.

| Identification code               | <b>1a</b>                                                                              | <b>1b</b>                                                                       | <b>1c</b>                                                                         | <b>1d</b>                                                                               | <b>1e</b>                                                                          | <b>1f</b>                                                                                 |
|-----------------------------------|----------------------------------------------------------------------------------------|---------------------------------------------------------------------------------|-----------------------------------------------------------------------------------|-----------------------------------------------------------------------------------------|------------------------------------------------------------------------------------|-------------------------------------------------------------------------------------------|
| CCDC                              | 2497318                                                                                | 2497319                                                                         | 2497320                                                                           | 2497321                                                                                 | 2497322                                                                            | 2497323                                                                                   |
| Empirical formula                 | C <sub>19</sub> H <sub>19</sub> NO                                                     | C <sub>20</sub> H <sub>21</sub> NO <sub>2</sub>                                 | C <sub>21</sub> H <sub>22</sub> Cl <sub>3</sub> NO <sub>2</sub>                   | C <sub>21</sub> H <sub>23</sub> NO <sub>3</sub>                                         | C <sub>21</sub> H <sub>23</sub> NO <sub>3</sub>                                    | C <sub>22</sub> H <sub>25</sub> NO <sub>4</sub>                                           |
| Formula weight                    | 277.35                                                                                 | 307.38                                                                          | 426.74                                                                            | 337.40                                                                                  | 337.40                                                                             | 367.43                                                                                    |
| Temperature                       | 100(2) K                                                                               | 100(2) K                                                                        | 100(2) K                                                                          | 100(2) K                                                                                | 100(2) K                                                                           | 100(2) K                                                                                  |
| Wavelength                        | 0.71073 Å                                                                              | 0.71073 Å                                                                       | 0.71073 Å                                                                         | 0.71073 Å                                                                               | 0.71073 Å                                                                          | 0.71073 Å                                                                                 |
| Crystal system                    | Monoclinic                                                                             | Orthorhombic                                                                    | Orthorhombic                                                                      | Monoclinic                                                                              | Orthorhombic                                                                       | Monoclinic                                                                                |
| Space group                       | P2 <sub>1</sub> /c                                                                     | Pbca                                                                            | Pna2 <sub>1</sub>                                                                 | P2 <sub>1</sub> /c                                                                      | Pna2 <sub>1</sub>                                                                  | P2 <sub>1</sub> /n                                                                        |
| Unit cell dimensions              | a = 14.669(4) Å α = 90°.<br>b = 10.904(3) Å β = 102.022(9)°<br>c = 9.588(3) Å γ = 90°. | a = 7.727(2) Å α = 90°.<br>b = 13.395(4) Å β = 90°.<br>c = 31.495(9) Å γ = 90°. | a = 10.719(3) Å α = 90°.<br>b = 26.404(6) Å β = 90°.<br>c = 7.2837(18) Å γ = 90°. | a = 12.280(2) Å α = 90°.<br>b = 13.278(3) Å β = 90.359(8)°.<br>c = 11.121(2) Å γ = 90°. | a = 6.4711(10) Å α = 90°.<br>b = 37.579(6) Å β = 90°.<br>c = 7.3111(10) Å γ = 90°. | a = 7.8584(13) Å α = 90°.<br>b = 7.1808(14) Å β = 95.044(6)°.<br>c = 35.233(7) Å γ = 90°. |
| Volume                            | 1499.9(6) Å <sup>3</sup>                                                               | 3259.8(16) Å <sup>3</sup>                                                       | 2061.5(9) Å <sup>3</sup>                                                          | 1813.4(6) Å <sup>3</sup>                                                                | 1777.9(5) Å <sup>3</sup>                                                           | 1980.5(6) Å <sup>3</sup>                                                                  |
| Z                                 | 4                                                                                      | 8                                                                               | 4                                                                                 | 4                                                                                       | 4                                                                                  | 4                                                                                         |
| Density (calculated)              | 1.228 Mg/m <sup>3</sup>                                                                | 1.253 Mg/m <sup>3</sup>                                                         | 1.375 Mg/m <sup>3</sup>                                                           | 1.236 Mg/m <sup>3</sup>                                                                 | 1.261 Mg/m <sup>3</sup>                                                            | 1.232 Mg/m <sup>3</sup>                                                                   |
| Absorption coefficient            | 0.075 mm <sup>-1</sup>                                                                 | 0.080 mm <sup>-1</sup>                                                          | 0.461 mm <sup>-1</sup>                                                            | 0.082 mm <sup>-1</sup>                                                                  | 0.084 mm <sup>-1</sup>                                                             | 0.084 mm <sup>-1</sup>                                                                    |
| F(000)                            | 592                                                                                    | 1312                                                                            | 888                                                                               | 720                                                                                     | 720                                                                                | 784                                                                                       |
| Crystal size                      | 0.318 x 0.292 x 0.234 mm <sup>3</sup>                                                  | 0.446 x 0.312 x 0.228 mm <sup>3</sup>                                           | 0.252 x 0.236 x 0.086 mm <sup>3</sup>                                             | 0.608 x 0.159 x 0.140 mm <sup>3</sup>                                                   | 0.633 x 0.427 x 0.150 mm <sup>3</sup>                                              | 0.532 x 0.492 x 0.226 mm <sup>3</sup>                                                     |
| Theta range for data collection   | 1.419 to 24.857°.                                                                      | 2.936 to 26.458°.                                                               | 2.050 to 26.453°.                                                                 | 1.658 to 26.458°.                                                                       | 2.168 to 28.264°.                                                                  | 2.321 to 28.466°.                                                                         |
| Index ranges                      | -17<=h<=17, -12<=k<=12, -11<=l<=11                                                     | -9<=h<=9, -16<=k<=16, -39<=l<=39                                                | -13<=h<=13, -29<=k<=32, -9<=l<=9                                                  | -15<=h<=15, -16<=k<=16, -13<=l<=13                                                      | -8<=h<=8, -50<=k<=50, -6<=l<=9                                                     | -10<=h<=10, -9<=k<=9, -47<=l<=47                                                          |
| Reflections collected             | 27525                                                                                  | 107477                                                                          | 23412                                                                             | 31563                                                                                   | 37508                                                                              | 86772                                                                                     |
| Independent reflections           | 2575 [R(int) = 0.0623]                                                                 | 3350 [R(int) = 0.0864]                                                          | 4162 [R(int) = 0.0675]                                                            | 3724 [R(int) = 0.0597]                                                                  | 3984 [R(int) = 0.0921]                                                             | 4970 [R(int) = 0.0809]                                                                    |
| Completeness to theta = 24.857°   | 99.0 %                                                                                 | 99.6 %                                                                          | 99.9 %                                                                            | 99.9 %                                                                                  | 99.9 %                                                                             | 99.7 %                                                                                    |
| Absorption correction             | Semi-empirical                                                                         | Semi-empirical                                                                  | Semi-empirical                                                                    | Semi-empirical                                                                          | Semi-empirical                                                                     | Semi-empirical                                                                            |
| Refinement method                 | Full-matrix least-squares on F <sup>2</sup>                                            | Full-matrix least-squares on F <sup>2</sup>                                     | Full-matrix least-squares on F <sup>2</sup>                                       | Full-matrix least-squares on F <sup>2</sup>                                             | Full-matrix least-squares on F <sup>2</sup>                                        | Full-matrix least-squares on F <sup>2</sup>                                               |
| Data / restraints / parameters    | 2575 / 0 / 237                                                                         | 3350 / 0 / 211                                                                  | 4162 / 1 / 247                                                                    | 3724 / 0 / 230                                                                          | 3984 / 1 / 230                                                                     | 4970 / 0 / 249                                                                            |
| Goodness-of-fit on F <sup>2</sup> | 1.127                                                                                  | 1.099                                                                           | 1.173                                                                             | 1.065                                                                                   | 1.043                                                                              | 1.052                                                                                     |
| Final R indices [I>2σ(I)]         | R1 = 0.0523, wR2 = 0.1170                                                              | R1 = 0.0414, wR2 = 0.0969                                                       | R1 = 0.0402, wR2 = 0.0749                                                         | R1 = 0.0409, wR2 = 0.0938                                                               | R1 = 0.0468, wR2 = 0.1033                                                          | R1 = 0.0472, wR2 = 0.1111                                                                 |
| R indices (all data)              | R1 = 0.0655, wR2 = 0.1247                                                              | R1 = 0.0512, wR2 = 0.1051                                                       | R1 = 0.0627, wR2 = 0.0893                                                         | R1 = 0.0556, wR2 = 0.1028                                                               | R1 = 0.0655, wR2 = 0.1162                                                          | R1 = 0.0622, wR2 = 0.1239                                                                 |
| Largest diff. peak and hole       | 0.197 and -0.195 e.Å <sup>-3</sup>                                                     | 0.239 and -0.185 e.Å <sup>-3</sup>                                              | 0.310 and -0.330 e.Å <sup>-3</sup>                                                | 0.174 and -0.197 e.Å <sup>-3</sup>                                                      | 0.210 and -0.203 e.Å <sup>-3</sup>                                                 | 0.289 and -0.236 e.Å <sup>-3</sup>                                                        |

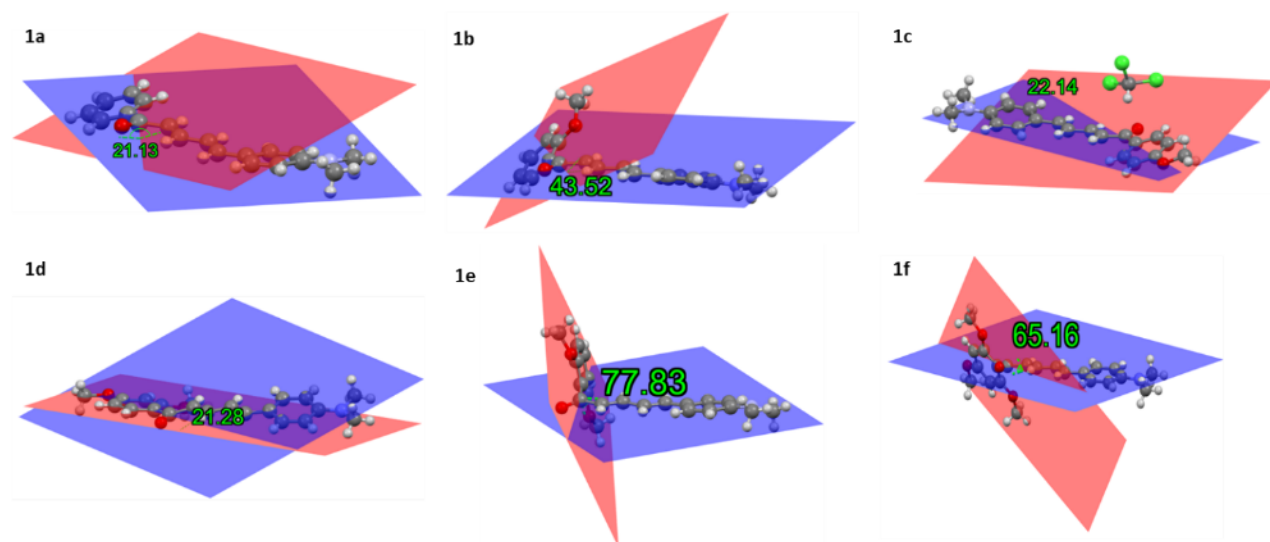

Figure S22. Interplanar angles from the crystal structures of 1a-1f.

Mercury was used to generate the red and blue reference planes shown above. The red plane was defined using only the carbon atoms of the A-ring, excluding methoxy substituents, while the blue plane was defined by the unsaturated carbon atoms spanning the enone linkage between the carbonyl group and the B-ring. The resulting interplanar angles therefore quantify the degree of torsional deviation between the A-ring and the conjugated backbone.

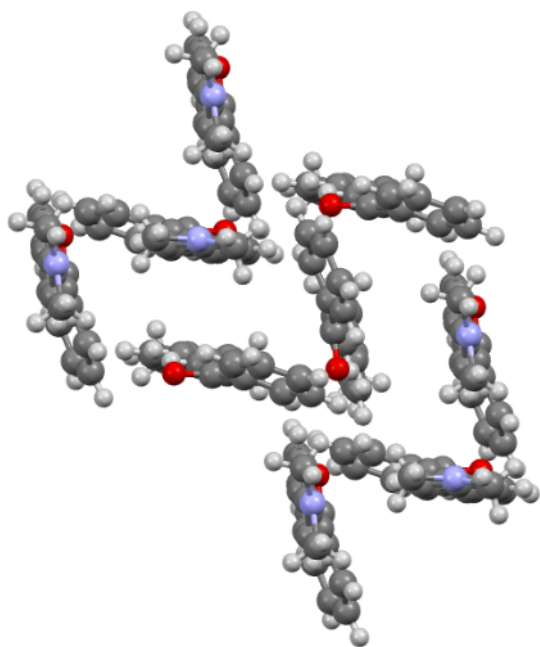

Figure S23. Crystal packing of chalcone **1a** illustrating the orthogonal packing behavior between the dimer-like complexes.

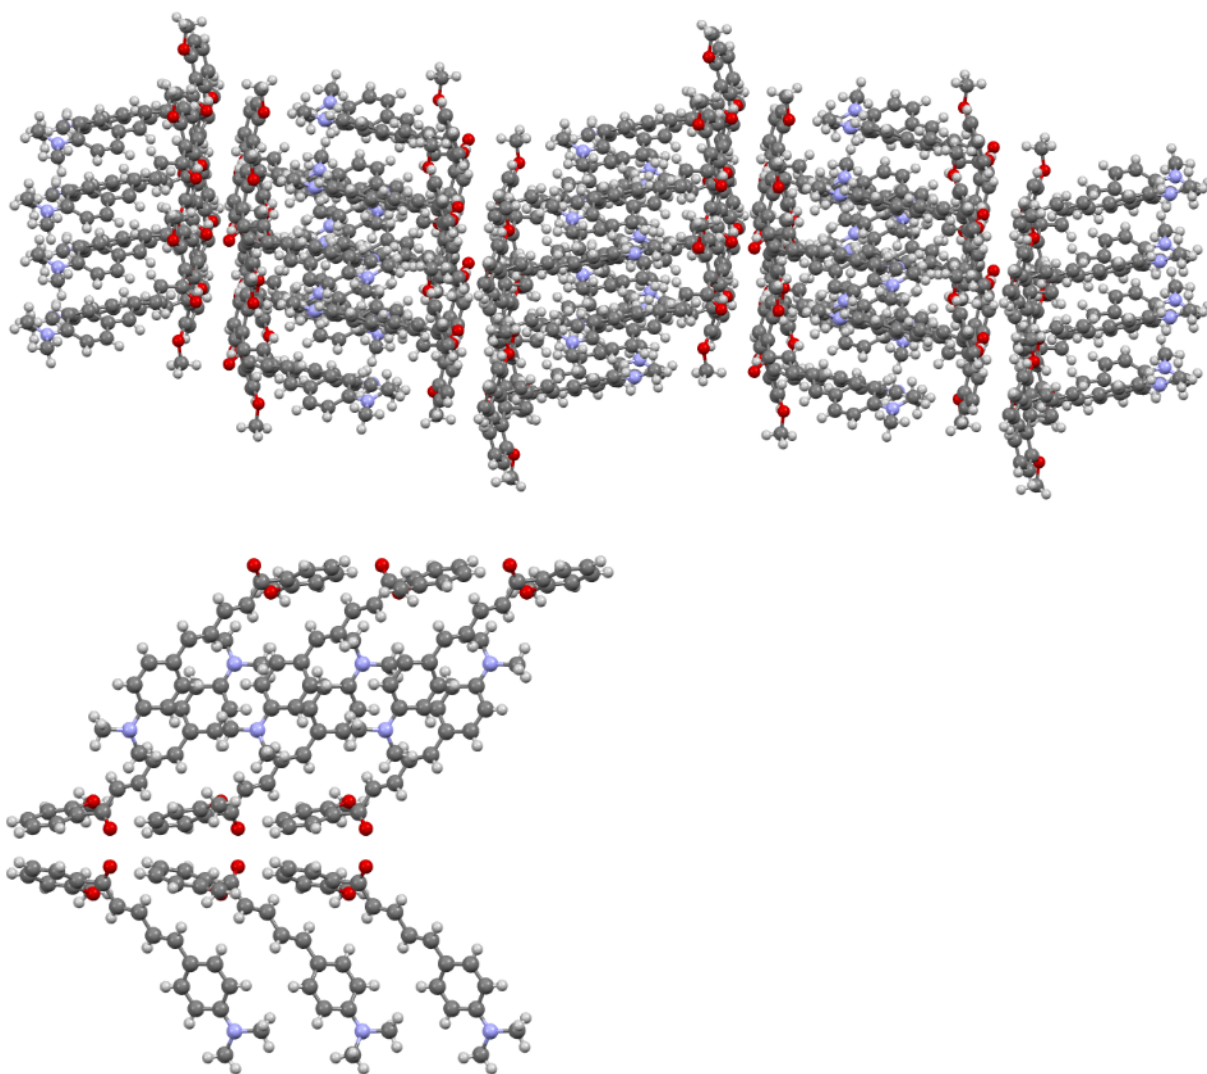

Figure S24. Top, crystal packing of **1b** along the “b” axis in a 2x2x2 matrix. Bottom, alternative view showing the nonparallel stacking of the A-rings in **1b**.

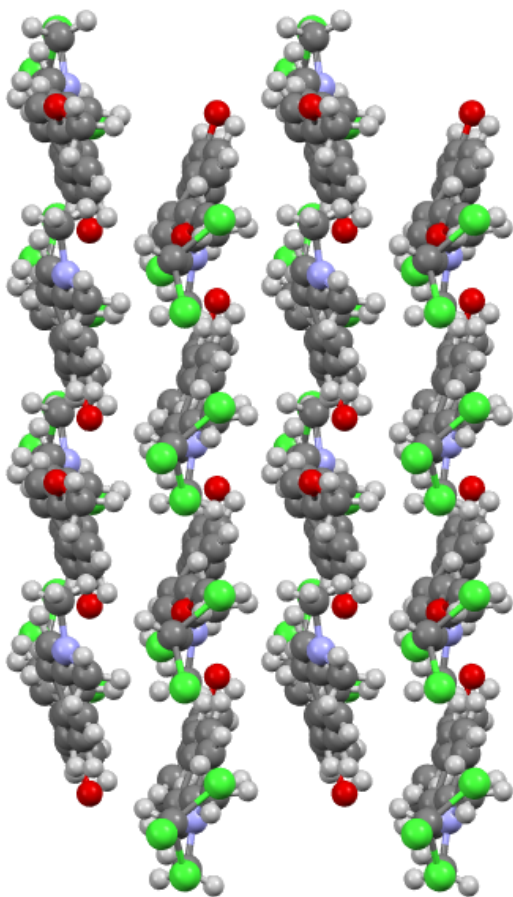

Figure S25. Crystal packing of **1c** along the b-axis. Chloroform molecules shown to highlight hydrogen bond formation to carbonyl unit of each chromophore.

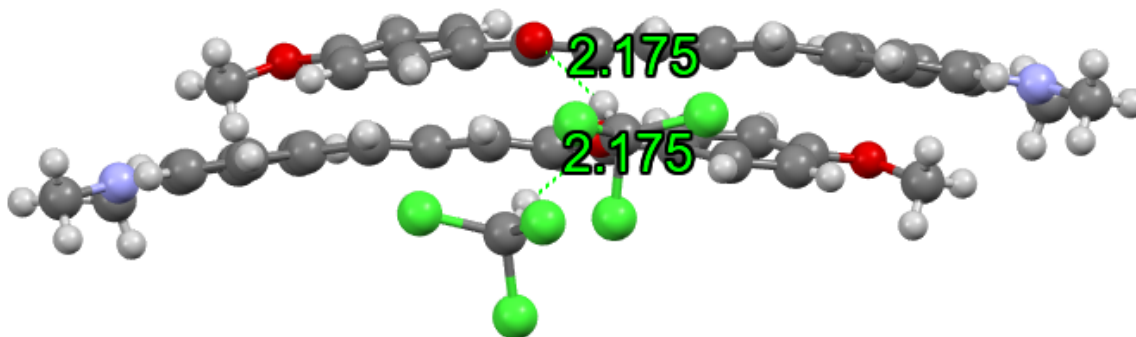

Figure S26. Crystal packing of **1c** showing intermolecular hydrogen bond distance (Å) between co-crystallized chloroform and the carbonyl oxygen.

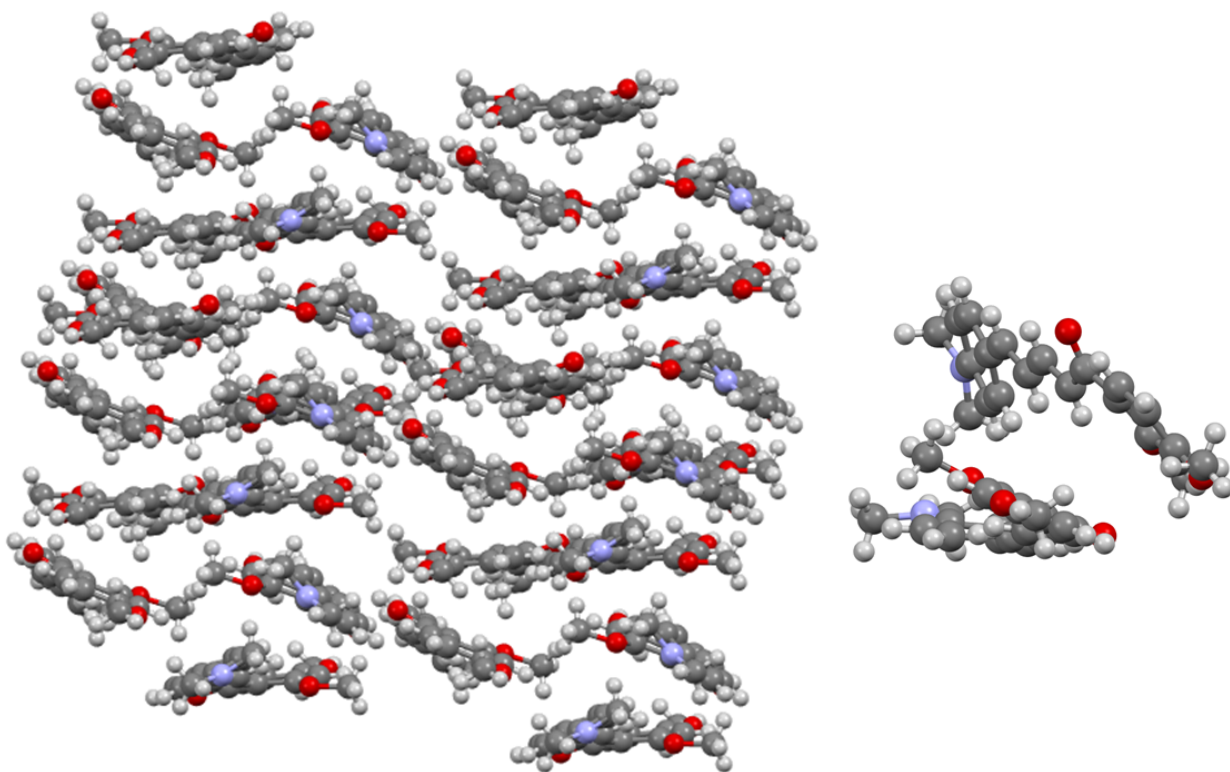

S27. Crystal packing of **1d** with an isolated view of the planar offset between two molecules on the right.

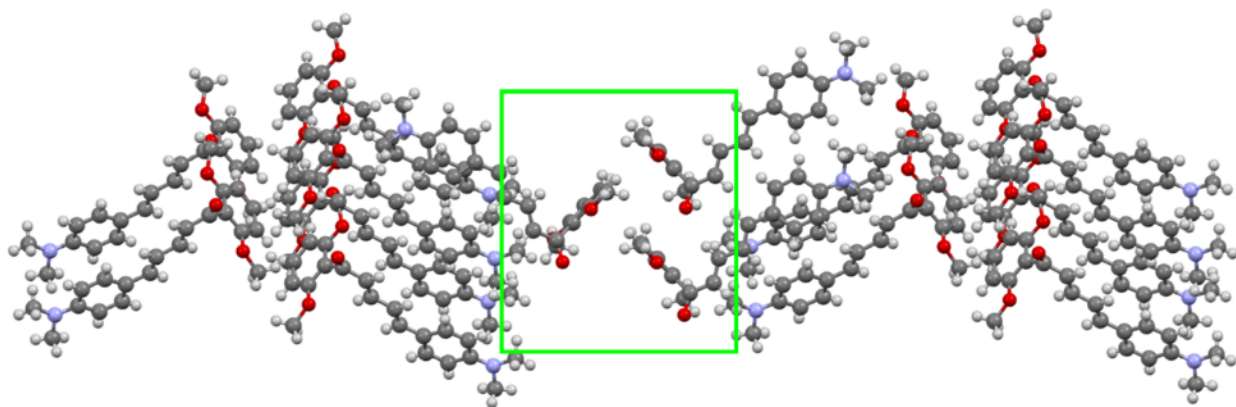

Figure S28. Crystal packing of **1e** illustrating an edge-to-face arrangement of the A-rings, highlighted in green.

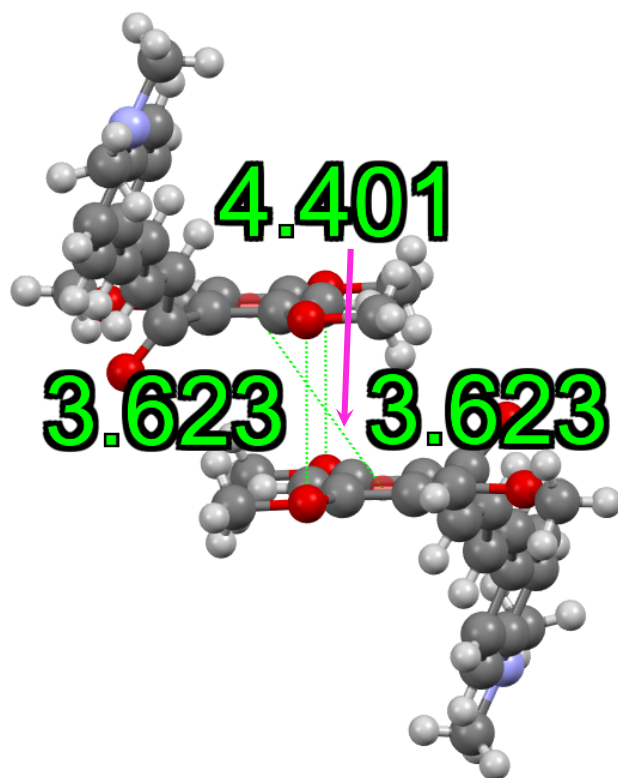

Figure S29. Crystal packing of **1f** illustrating the slip-stacked packing behavior. The centroid distances is 4.401 Å and indicated by the pink arrow. The interatomic distance between the 2 vertically aligned ortho and para methoxy groups is identical at 3.623 Å.

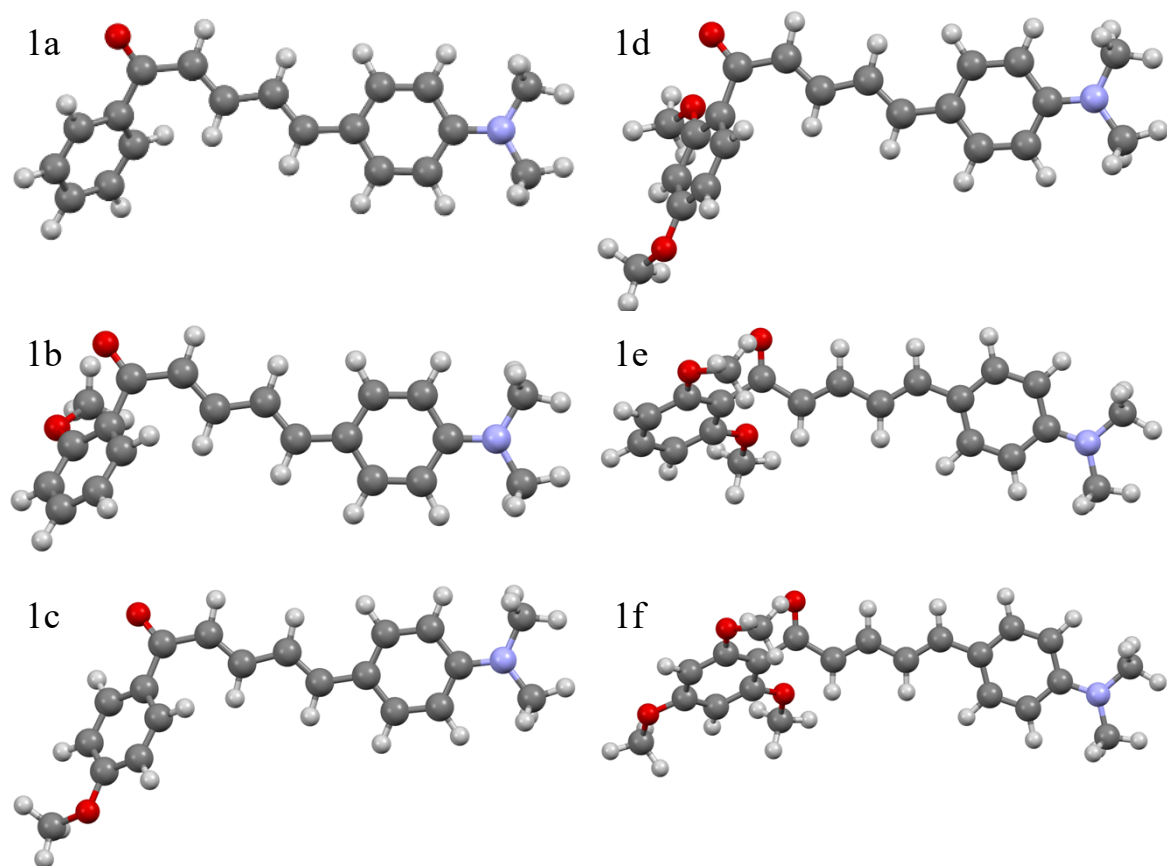

Figure S30. Optimized ground state geometries of series of **1a-1f**.

Table S5. Comparison of Kohn–Sham energy gaps and computed TD-DFT optical transition energies in DCM.

| Compound | $\epsilon(\text{HOMO})$ (eV) | $\epsilon(\text{LUMO})$ (eV) | $\Delta E_{\text{KS}}^{\text{a}}$ (eV) | $\lambda_{\text{abs}}$ (nm) | $E_{\text{abs}}^{\text{b}}$ (eV) | $\lambda_{\text{em}}$ (nm) | $E_{\text{em}}^{\text{b}}$ (eV) |
|----------|------------------------------|------------------------------|----------------------------------------|-----------------------------|----------------------------------|----------------------------|---------------------------------|
| 1a       | -5.272                       | -2.273                       | 2.999                                  | 446                         | 2.780                            | 510                        | 2.431                           |
| 1b       | -5.320                       | -2.080                       | 3.240                                  | 440                         | 2.818                            | 501                        | 2.475                           |
| 1c       | -5.239                       | -2.198                       | 3.041                                  | 443                         | 2.799                            | 505                        | 2.455                           |
| 1d       | -5.241                       | -2.168                       | 3.073                                  | 435                         | 2.850                            | 495                        | 2.505                           |
| 1e       | -5.239                       | -2.300                       | 2.939                                  | 456                         | 2.719                            | 516                        | 2.403                           |
| 1f       | -5.211                       | -2.244                       | 2.967                                  | 456                         | 2.719                            | 478                        | 2.594                           |

<sup>a</sup>  $\Delta E_{\text{KS}} = \epsilon(\text{LUMO}) - \epsilon(\text{HOMO})$ . Kohn–Sham orbital energies were obtained from optimized  $S_0$  geometries (B3LYP/6-311G(d), PCM-DCM).

<sup>b</sup> Optical transition energies were converted using  $E(\text{eV}) = 1239.84/\lambda(\text{nm})$ .

Table S6. Comparison of experimental and calculated TD-DFT optical transition energies in DCM.

| Compound  | Exp<br>$\lambda_{\text{abs}}$ (nm) | Exp<br>$E_{\text{abs}}$ (eV) | Exp<br>$\lambda_{\text{em}}$ (nm) | Exp<br>$E_{\text{em}}$ (eV) | Calcd<br>$\lambda_{\text{abs}}$ (nm) | Calcd<br>$E_{\text{abs}}$ (eV) | Calcd<br>$\lambda_{\text{em}}$ (nm) | Calcd<br>$E_{\text{em}}$ (eV) |
|-----------|------------------------------------|------------------------------|-----------------------------------|-----------------------------|--------------------------------------|--------------------------------|-------------------------------------|-------------------------------|
| <b>1a</b> | 437                                | 2.84                         | 586                               | 2.12                        | 446                                  | 2.78                           | 510                                 | 2.43                          |
| <b>1b</b> | 424                                | 2.92                         | 580                               | 2.14                        | 440                                  | 2.82                           | 501                                 | 2.48                          |
| <b>1c</b> | 429                                | 2.89                         | 572                               | 2.17                        | 443                                  | 2.80                           | 505                                 | 2.46                          |
| <b>1d</b> | 424                                | 2.92                         | 570                               | 2.18                        | 435                                  | 2.85                           | 495                                 | 2.51                          |
| <b>1e</b> | 417                                | 2.97                         | 543                               | 2.28                        | 456                                  | 2.72                           | 516                                 | 2.40                          |
| <b>1f</b> | 415                                | 2.99                         | 542                               | 2.29                        | 456                                  | 2.72                           | 478                                 | 2.59                          |

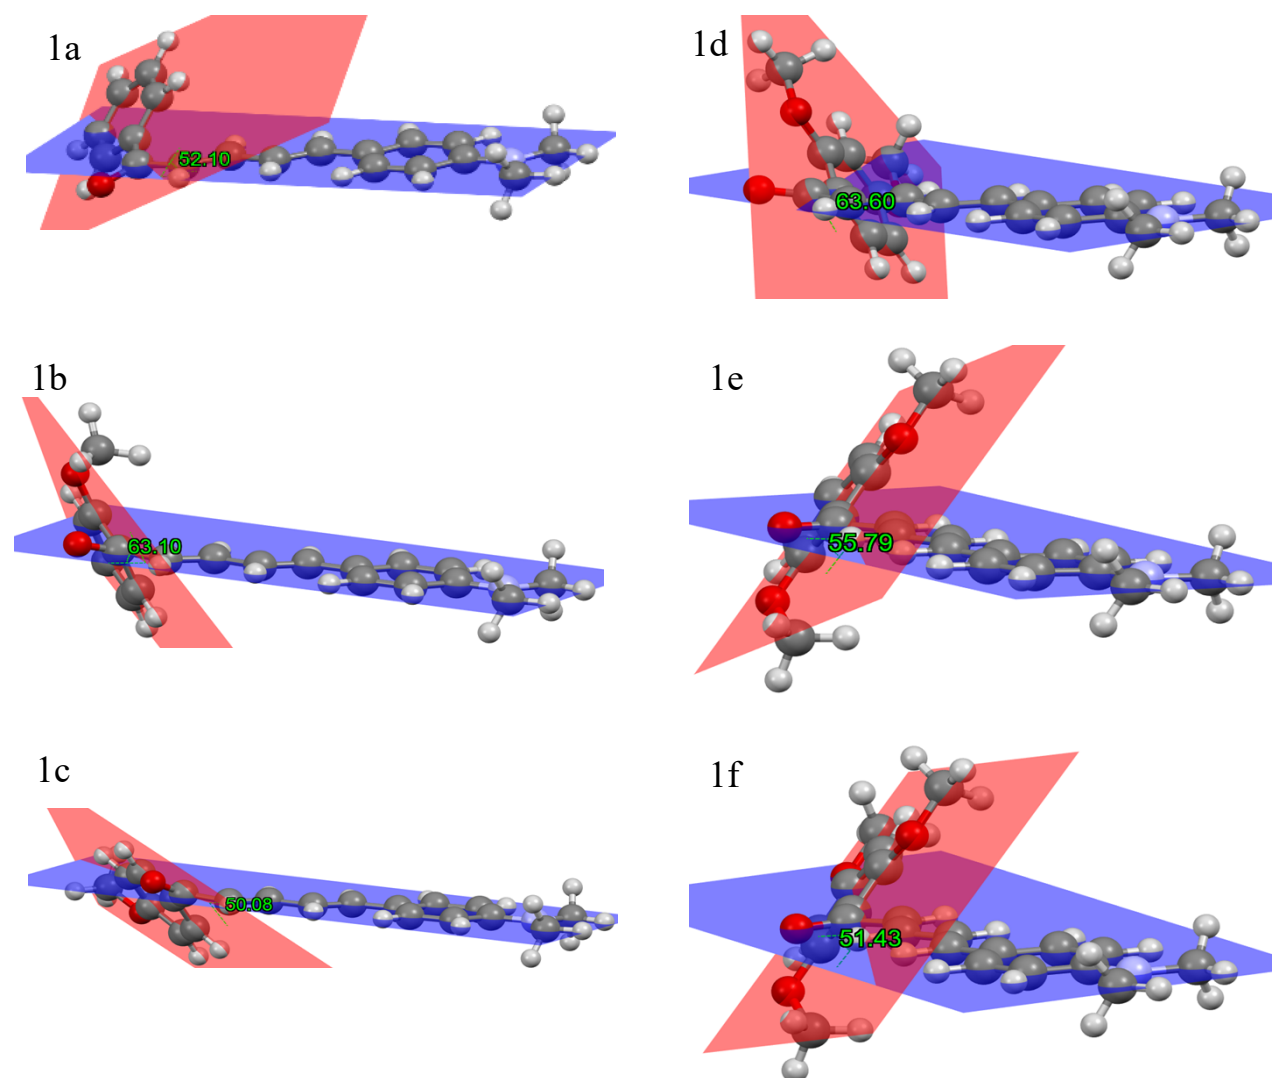

Figure S31. Interplanar angles of the A-ring (red) and B-ring (blue) for series of **1a-1f** using the optimized ground state geometries .

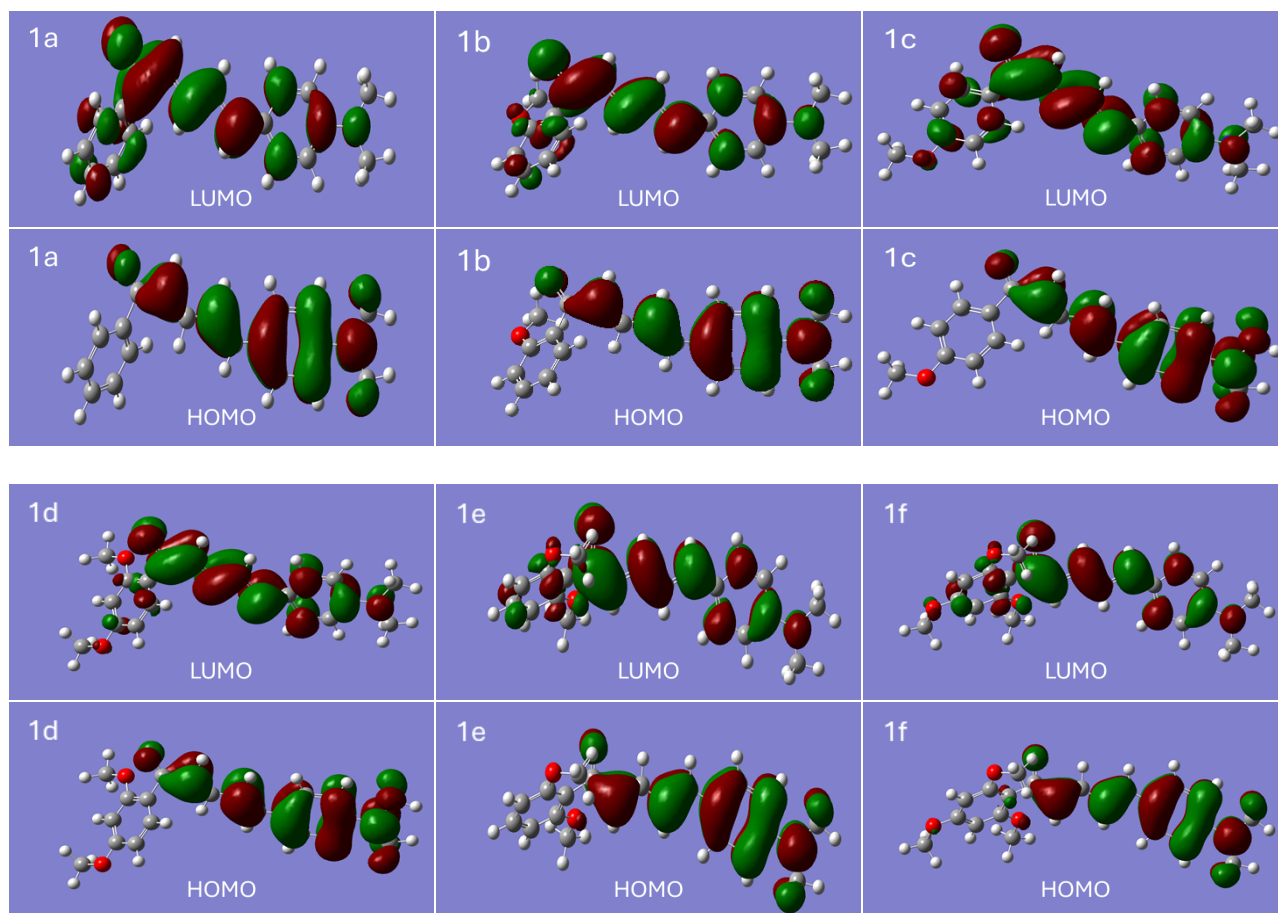

Figure S32. HOMO-LUMO diagrams of **1a-1f** calculated using B3LYP/6-311G(d) in DCM.
